# Supplementary material for: Quantitative and qualitative evaluation of the impact of the G2 enhancer, bead sizes and lysing tubes on the bacterial community composition during DNA extraction from recalcitrant soil core samples based on community sequencing and qPCR
Source: PubMed Central journal article supplement (PMC6459482; doi:10.1371/journal.pone.0200979), 2019-04-11
Supplement: pone.0200979.s001.pdf [file pone.0200979.s001.pdf]

**S1 Table. Qubit measurements (ng/μl).**

| <b>Serie n</b>          | Serie 1                | Serie 2    | Serie 3   | Serie 4    | Serie 5    | Serie 6  | Serie 7  | Serie 8    | Serie 9    | Negative control |           |
|-------------------------|------------------------|------------|-----------|------------|------------|----------|----------|------------|------------|------------------|-----------|
|                         | Fast tube              | Fast tube  | Fast tube | Fast tube  | Ampliqon   | Ampliqon | Ampliqon | Ampliqon   | Ampliqon   | Fast tube        | Fast tube |
|                         | Mixed                  | Mixed      | 1.4 mm    | 0.1 mm     | 1.4 mm     | 0.1 mm   | 1.4 mm   | 0.1 mm     | Mixed      | Mixed            | Mixed     |
|                         | <b>With/Without G2</b> | Without G2 | With G2   | Without G2 | Without G2 | With G2  | With G2  | Without G2 | Without G2 | Without G2       | With G2   |
| <b>1a</b>               | 0.737                  | 1.180      | 0.373     | 0.272      | 1.140      | 0.554    | 0.261    | 0.222      | 0.478      | -                | -         |
| <b>2a</b>               | 0.567                  | 1.090      | 0.324     | 0.314      | 1.020      | 0.517    | 0.338    | 0.323      | 0.556      | -                | -         |
| <b>3a</b>               | 0.543                  | 1.300      | 0.356     | 0.263      | 1.010      | 0.535    | 0.315    | 0.288      | 0.507      | -                | -         |
| <b>4a</b>               | 0.473                  | 1.180      | 0.399     | 0.319      | 0.935      | 0.565    | 0.350    | 0.240      | 0.518      | -                | -         |
| <b>5a</b>               | 0.639                  | 1.110      | 0.346     | 0.301      | 0.987      | 0.423    | 0.306    | 0.261      | 0.457      | -                | -         |
| <b>1b</b>               | 0.700                  | 1.400      | 0.355     | 0.273      | 1.030      | 0.606    | 0.318    | 0.235      | 0.528      | -                | -         |
| <b>2b</b>               | 0.735                  | 1.310      | 0.320     | 0.353      | 1.810      | 0.472    | 0.363    | 0.336      | 0.545      | -                | -         |
| <b>3b</b>               | 0.694                  | 1.350      | 0.308     | 0.267      | 1.040      | 0.583    | 0.268    | 0.274      | 0.457      | -                | -         |
| <b>4b</b>               | 0.630                  | 1.300      | 0.363     | 0.259      | 0.929      | 0.581    | 0.366    | 0.222      | 0.621      | -                | -         |
| <b>5b</b>               | 0.669                  | 1.170      | 0.328     | 0.279      | 1.030      | 0.537    | 0.289    | 0.254      | 0.469      | -                | -         |
| <b>1c</b>               | 0.807                  | 1.520      | 0.363     | 0.242      | 1.190      | 0.771    | 0.294    | 0.173      | 0.542      | -                | -         |
| <b>2c</b>               | 0.865                  | 1.250      | 0.356     | 0.368      | 1.210      | 0.569    | 0.418    | 0.361      | 0.567      | -                | -         |
| <b>3c</b>               | 0.688                  | 1.590      | 0.289     | 0.307      | 1.020      | 0.585    | 0.269    | 0.268      | 0.456      | -                | -         |
| <b>4c</b>               | 0.682                  | 1.300      | 0.390     | 0.290      | 1.100      | 0.672    | 0.337    | 0.212      | 0.454      | -                | -         |
| <b>5c</b>               | 0.774                  | 1.130      | 0.269     | 0.311      | 0.975      | 0.597    | 0.266    | 0.242      | 0.334      | -                | -         |
| <b>Average 1a:5a</b>    | 0.5918                 | 1.172      | 0.3596    | 0.2938     | 1.0184     | 0.5188   | 0.314    | 0.2668     | 0.5032     | -                | -         |
| <b>Average 1b:5b</b>    | 0.6856                 | 1.306      | 0.3348    | 0.2862     | 1.1678     | 0.5558   | 0.3208   | 0.2642     | 0.524      | -                | -         |
| <b>Average 1c:5c</b>    | 0.7632                 | 1.358      | 0.3334    | 0.3036     | 1.099      | 0.6388   | 0.3168   | 0.2512     | 0.4706     | -                | -         |
| <b>Average 1a;1b;1c</b> | 0.748                  | 1.367      | 0.364     | 0.262      | 1.120      | 0.644    | 0.291    | 0.210      | 0.516      | 0.050            | <D.L.     |
| <b>Average 2a;2b;2c</b> | 0.722                  | 1.217      | 0.333     | 0.345      | 1.347      | 0.519    | 0.373    | 0.340      | 0.556      | 0.115            | 0.060     |
| <b>Average 3a;3b;3c</b> | 0.642                  | 1.413      | 0.318     | 0.279      | 1.023      | 0.568    | 0.284    | 0.277      | 0.473      | 0.086            | <D.L.     |
| <b>Average 4a;4b;4c</b> | 0.595                  | 1.260      | 0.384     | 0.289      | 0.988      | 0.606    | 0.351    | 0.225      | 0.531      | 0.104            | 0.080     |
| <b>Average 5a;5b;5c</b> | 0.694                  | 1.137      | 0.314     | 0.297      | 0.997      | 0.519    | 0.287    | 0.252      | 0.420      | 0.121            |           |
| <b>Average</b>          | 0.68                   | 1.28       | 0.34      | 0.29       | 1.10       | 0.57     | 0.32     | 0.26       | 0.50       | 0.095            | 0.07      |
| <b>STD</b>              | 0.0153                 | 0.0502     | 0.0037    | 0.0039     | 0.0901     | 0.0119   | 0.0070   | 0.0105     | 0.0115     | 0.0033           | 0.0002    |

Series 1 to 9 corresponding to five individual samples, measured in triplicates (a, b and c)
