# Supplementary material for: Quantitative and qualitative evaluation of the impact of the G2 enhancer, bead sizes and lysing tubes on the bacterial community composition during DNA extraction from recalcitrant soil core samples based on community sequencing and qPCR
Source: PubMed Central journal article supplement (PMC6459482; doi:10.1371/journal.pone.0200979), 2019-04-11
Supplement: pone.0200979.s003.pdf [file pone.0200979.s003.pdf]

**S3 Table. qPCR copy-number results (quantification based on 16s Gene/μl)**

| FAST tube +<br>Mix beads<br>FAST - G2 | FAST tube +<br>Mix beads<br>FAST + G2 | FAST tube +<br>1.4 mm beads<br>- G2 | FAST tube +<br>0.1 mm beads<br>- G2 | Ampliqon tube<br>+ 1.4 mm<br>beads + G2 | Ampliqon tube<br>+ 0.1 mm<br>beads + G2 | Ampliqon tube<br>+ 1.4 mm<br>beads - G2 | Ampliqon tube<br>+ 0.1 mm<br>beads - G2 | Ampliqon tube +<br>Mix beads FAST<br>- G2 |
|---------------------------------------|---------------------------------------|-------------------------------------|-------------------------------------|-----------------------------------------|-----------------------------------------|-----------------------------------------|-----------------------------------------|-------------------------------------------|
| 239.674                               | 533.510                               | 150.081                             | 136.344                             | 344.158                                 | 197.511                                 | 146.488                                 | 122.612                                 | 306.625                                   |
| 288.782                               | 474.536                               | 146.095                             | 119.145                             | 361.691                                 | 217.290                                 | 147.103                                 | 99.747                                  | 278.049                                   |
| 278.633                               | 373.218                               | 156.656                             | 86.502                              | 447.643                                 | 139.696                                 | 135.779                                 | 104.346                                 | 257.049                                   |
| 357.835                               | 441.625                               | 120.722                             | 168.695                             | 460.500                                 | 174.806                                 | 168.359                                 | 161.059                                 | 289.533                                   |
| 310.236                               | 711.104                               | 161.245                             | 126.655                             | 417.669                                 | 188.429                                 | 134.722                                 | 141.191                                 | 286.099                                   |
| 324.357                               | 541.500                               | 98.555                              | 114.850                             | 436.516                                 | 190.285                                 | 142.007                                 | 143.750                                 | 271.976                                   |
| 265.700                               | 547.510                               | 154.716                             | 126.569                             | 383.342                                 | 246.825                                 | 139.759                                 | 128.784                                 | 266.401                                   |
| 271.138                               | 608.738                               | 158.943                             | 78.312                              | 347.810                                 | 193.563                                 | 143.349                                 | 128.784                                 | 275.977                                   |
| 264.020                               | 545.876                               | 169.024                             | 89.805                              | 266.555                                 | 211.566                                 | 157.162                                 | 128.784                                 | 278.869                                   |
| Average                               |                                       |                                     |                                     |                                         |                                         |                                         |                                         |                                           |
| 288.931                               | 530.846                               | 146.226                             | 116.320                             | 385.098                                 | 195.552                                 | 146.081                                 | 128.784                                 | 278.953                                   |
| Std.                                  |                                       |                                     |                                     |                                         |                                         |                                         |                                         |                                           |
| 34.101                                | 91.386                                | 21.150                              | 26.673                              | 58.663                                  | 27.878                                  | 10.108                                  | 17.944                                  | 13.435                                    |
