# Supplementary material for: Quantitative and qualitative evaluation of the impact of the G2 enhancer, bead sizes and lysing tubes on the bacterial community composition during DNA extraction from recalcitrant soil core samples based on community sequencing and qPCR
Source: PubMed Central journal article supplement (PMC6459482; doi:10.1371/journal.pone.0200979), 2019-04-11
Supplement: pone.0200979.s004.pdf [file pone.0200979.s004.pdf]

**S4 Table. ANOVA table based on qPCR dataset**

| Source of Variation | SS                      | df | MS                      | F          | P-value                | F crit    |
|---------------------|-------------------------|----|-------------------------|------------|------------------------|-----------|
| Between Groups      | 1.58179E <sup>+12</sup> | 9  | 1.75755E <sup>+11</sup> | 93.2553326 | 1.0147E <sup>-36</sup> | 2.0090249 |
| Within Groups       | 1.39465E <sup>+11</sup> | 74 | 1.884.663.581           |            |                        |           |
| Total               | 1.72126E <sup>+12</sup> | 83 |                         |            |                        |           |
