# Supplementary material for: Quantitative and qualitative evaluation of the impact of the G2 enhancer, bead sizes and lysing tubes on the bacterial community composition during DNA extraction from recalcitrant soil core samples based on community sequencing and qPCR
Source: PubMed Central journal article supplement (PMC6459482; doi:10.1371/journal.pone.0200979), 2019-04-11
Supplement: pone.0200979.s005.pdf [file pone.0200979.s005.pdf]

**S5 Table. Scheffe's score for qPCR dataset based on the difference series comparisons**

| Scheffe's Critic | First Comparison                  | Second Comparison                 | Scheffe's Score  |
|------------------|-----------------------------------|-----------------------------------|------------------|
| <b>26.117</b>    | Fast tube + Mix beads + G2        | Fast tube + Mix beads             | <b>139.74 a*</b> |
|                  | Fast tube + 1.4 beads             | Fast tube + 0.1 mm beads          | 2.14             |
|                  | Fast tube + Mix beads             | Fast tube + 1.4 mm beads          | <b>48.62 b*</b>  |
|                  | Fast tube + Mix beads             | Fast tube + 0.1 mm beads          | <b>71.14 b*</b>  |
|                  | Ampliqon tube + 1.4 mm beads + G2 | Ampliqon tube + 1.4 mm beads      | <b>136.41 a*</b> |
|                  | Ampliqon tube + 0.1 mm beads + G2 | Ampliqon tube + 0.1 mm beads      | 10.64 a          |
|                  | Ampliqon tube + 1.4 mm beads + G2 | Ampliqon tube + 0.1 mm beads + G2 | <b>85.78 d*</b>  |
|                  | Ampliqon tube + 1.4 mm beads      | Ampliqon tube + 0.1 mm beads      | 0.71 d           |
|                  | Ampliqon tube + Mix beads         | Fast tube + Mix beads             | 0.24 e           |
|                  | Ampliqon tube + 1.4 mm beads      | Fast tube + 1.4 mm beads          | 0.00 e           |
|                  | Ampliqon tube + 0.1 mm beads      | Fast tube + 0.1 mm beads          | 0.37 e           |
|                  | Fast tube + Mix beads             | Ampliqon tube + Mix beads         | 0.24             |
|                  | Fast Tube + Mix Beads + Neg + G2  | Fast Tube + Mix Beads + G2        | <b>334.82 c*</b> |
|                  | Fast Tube + Mix Beads + Neg + G2  | Fast Tube + Mix Beads + Neg       | 5.04 c           |

A result is considered to be statistically relevant when the Scheffe's score is higher than the Scheffe's critical value (Scheffe's Critic = 26.117). \* Identify statistically relevant comparison, while letters identify the category in which they belong. **a**: Comparison based on presence/absence of G2. **b**: Comparison between mixed-beads and respectively 1.4 mm and 0.1 mm. **c**: Comparison between the series A-NEG+G2 and B. A-NEG+G2 and A-NEG (all reported in Table 1) to show that, based on the controls, G2 does not have any effect statistically relevant in terms of yield of DNA. **d**: Comparison between different bead-size (1.4 and 0.1 mm) in presence/absence of G2 **e**: Comparison between the different plastic tubes to evaluate the plastic-effect. **(139.74)** Statistically significant
