# Supplementary material for: Quantitative and qualitative evaluation of the impact of the G2 enhancer, bead sizes and lysing tubes on the bacterial community composition during DNA extraction from recalcitrant soil core samples based on community sequencing and qPCR
Source: PubMed Central journal article supplement (PMC6459482; doi:10.1371/journal.pone.0200979), 2019-04-11
Supplement: pone.0200979.s007.pdf [file pone.0200979.s007.pdf]

**S7 Table. ANCOM summary based on G2 comparison.**

,Reject null hypothesis,W

|             |                    |                         |                      |                                       |
|-------------|--------------------|-------------------------|----------------------|---------------------------------------|
| Unassigned  | —                  | —                       | —                    | __,False,0                            |
| k__Archaea  | —                  | —                       | —                    | __,False,0                            |
| k__Archaea  | p__Crenarchaeota   | c__MBGA                 | —                    | __,False,0                            |
| k__Archaea  | p__Crenarchaeota   | c__MBGA                 | o__                  | f__,False,0                           |
| k__Archaea  | p__Crenarchaeota   | c__Thaumarchaeota       | o__AK31              | f__,False,0                           |
| k__Archaea  | p__Crenarchaeota   | c__Thaumarchaeota       | o__Cenarchaeales     | __,False,0                            |
| k__Archaea  | p__Crenarchaeota   | c__Thaumarchaeota       | o__Cenarchaeales     | f__,False,0                           |
| k__Archaea  | p__Crenarchaeota   | c__Thaumarchaeota       | o__Cenarchaeales     | f__Cenarchaeaceae,False,0             |
| k__Archaea  | p__Crenarchaeota   | c__Thaumarchaeota       | o__Nitrososphaerales | f__Nitrososphaeraceae,False,0         |
| k__Archaea  | p__Euryarchaeota   | —                       | —                    | __,False,0                            |
| k__Archaea  | p__Euryarchaeota   | c__Thermoplasmata       | o__E2                | __,False,0                            |
| k__Archaea  | p__Euryarchaeota   | c__Thermoplasmata       | o__E2                | f__TMEG,False,0                       |
| k__Archaea  | p__Euryarchaeota   | c__Thermoplasmata       | o__E2                | f__[Methanomassiliicoccaceae],False,0 |
| k__Archaea  | p__[Parvarchaeota] | c__[Parvarchaea]        | o__WCHD3-30          | f__,False,0                           |
| k__Archaea  | p__[Parvarchaeota] | c__[Parvarchaea]        | o__YLA114            | f__,False,0                           |
| k__Bacteria | —                  | —                       | —                    | __,False,0                            |
| k__Bacteria | p__Acidobacteria   | —                       | —                    | __,False,0                            |
| k__Bacteria | p__Acidobacteria   | c__                     | o__                  | f__,False,0                           |
| k__Bacteria | p__Acidobacteria   | c__Acidobacteria-5      | o__                  | f__,False,0                           |
| k__Bacteria | p__Acidobacteria   | c__Acidobacteria-6      | —                    | __,False,0                            |
| k__Bacteria | p__Acidobacteria   | c__Acidobacteria-6      | o__BPC015            | f__,False,0                           |
| k__Bacteria | p__Acidobacteria   | c__Acidobacteria-6      | o__CCU21             | f__,False,0                           |
| k__Bacteria | p__Acidobacteria   | c__Acidobacteria-6      | o__iii1-15           | __,False,0                            |
| k__Bacteria | p__Acidobacteria   | c__Acidobacteria-6      | o__iii1-15           | f__,False,0                           |
| k__Bacteria | p__Acidobacteria   | c__Acidobacteria-6      | o__iii1-15           | f__RB40,False,0                       |
| k__Bacteria | p__Acidobacteria   | c__Acidobacteria-6      | o__iii1-15           | f__mb2424,False,0                     |
| k__Bacteria | p__Acidobacteria   | c__Acidobacteriia       | o__Acidobacteriales  | __,False,0                            |
| k__Bacteria | p__Acidobacteria   | c__Acidobacteriia       | o__Acidobacteriales  | f__Koribacteraceae,False,0            |
| k__Bacteria | p__Acidobacteria   | c__BPC102               | o__                  | f__,False,0                           |
| k__Bacteria | p__Acidobacteria   | c__BPC102               | o__B110              | f__,False,0                           |
| k__Bacteria | p__Acidobacteria   | c__BPC102               | o__MVS-40            | f__,False,0                           |
| k__Bacteria | p__Acidobacteria   | c__DA052                | o__E29               | f__,False,0                           |
| k__Bacteria | p__Acidobacteria   | c__DA052                | o__Ellin6513         | f__,False,0                           |
| k__Bacteria | p__Acidobacteria   | c__EC1113               | o__                  | f__,False,0                           |
| k__Bacteria | p__Acidobacteria   | c__PAUC37f              | o__                  | f__,False,0                           |
| k__Bacteria | p__Acidobacteria   | c__RB25                 | o__                  | f__,False,0                           |
| k__Bacteria | p__Acidobacteria   | c__S035                 | o__                  | f__,False,0                           |
| k__Bacteria | p__Acidobacteria   | c__Solibacteres         | o__JH-WHS99          | f__,False,0                           |
| k__Bacteria | p__Acidobacteria   | c__Solibacteres         | o__Solibacterales    | __,False,0                            |
| k__Bacteria | p__Acidobacteria   | c__Solibacteres         | o__Solibacterales    | f__,False,0                           |
| k__Bacteria | p__Acidobacteria   | c__Solibacteres         | o__Solibacterales    | f__PAUC26f,False,0                    |
| k__Bacteria | p__Acidobacteria   | c__Solibacteres         | o__Solibacterales    | f__Solibacteraceae,False,0            |
| k__Bacteria | p__Acidobacteria   | c__Sva0725              | o__Sva0725           | f__,False,0                           |
| k__Bacteria | p__Acidobacteria   | c__TM1                  | o__                  | f__,False,0                           |
| k__Bacteria | p__Acidobacteria   | c__[Chloracidobacteria] | —                    | __,False,0                            |
| k__Bacteria | p__Acidobacteria   | c__[Chloracidobacteria] | o__11-24             | f__,False,0                           |
| k__Bacteria | p__Acidobacteria   | c__[Chloracidobacteria] | o__                  | f__,False,0                           |
| k__Bacteria | p__Acidobacteria   | c__[Chloracidobacteria] | o__PK29              | f__,False,0                           |
| k__Bacteria | p__Acidobacteria   | c__[Chloracidobacteria] | o__RB41              | __,False,0                            |
| k__Bacteria | p__Acidobacteria   | c__[Chloracidobacteria] | o__RB41              | f__,False,0                           |
| k__Bacteria | p__Acidobacteria   | c__[Chloracidobacteria] | o__RB41              | f__Ellin6075,False,0                  |
| k__Bacteria | p__Acidobacteria   | c__iii1-8               | o__32-20             | f__,False,0                           |
| k__Bacteria | p__Acidobacteria   | c__iii1-8               | o__DS-18             | f__,False,0                           |
| k__Bacteria | p__Actinobacteria  | —                       | —                    | __,False,0                            |
| k__Bacteria | p__Actinobacteria  | c__Acidimicrobiia       | o__Acidimicrobiales  | __,False,0                            |
| k__Bacteria | p__Actinobacteria  | c__Acidimicrobiia       | o__Acidimicrobiales  | f__,False,0                           |
| k__Bacteria | p__Actinobacteria  | c__Acidimicrobiia       | o__Acidimicrobiales  | f__AKIW874,False,0                    |
| k__Bacteria | p__Actinobacteria  | c__Acidimicrobiia       | o__Acidimicrobiales  | f__C111,False,0                       |
| k__Bacteria | p__Actinobacteria  | c__Acidimicrobiia       | o__Acidimicrobiales  | f__EB1017,False,0                     |
| k__Bacteria | p__Actinobacteria  | c__Acidimicrobiia       | o__Acidimicrobiales  | f__Iamiaceae,False,0                  |
| k__Bacteria | p__Actinobacteria  | c__Acidimicrobiia       | o__Acidimicrobiales  | f__koll13,False,0                     |
| k__Bacteria | p__Actinobacteria  | c__Actinobacteria       | —                    | __,False,0                            |
| k__Bacteria | p__Actinobacteria  | c__Actinobacteria       | o__Actinomycetales   | __,False,0                            |
| k__Bacteria | p__Actinobacteria  | c__Actinobacteria       | o__Actinomycetales   | f__,False,0                           |
| k__Bacteria | p__Actinobacteria  | c__Actinobacteria       | o__Actinomycetales   | f__Actinosynnemataceae,False,0        |
| k__Bacteria | p__Actinobacteria  | c__Actinobacteria       | o__Actinomycetales   | f__Frankiaceae,False,0                |
| k__Bacteria | p__Actinobacteria  | c__Actinobacteria       | o__Actinomycetales   | f__Glycomycetaceae,False,0            |
| k__Bacteria | p__Actinobacteria  | c__Actinobacteria       | o__Actinomycetales   | f__Microbacteriaceae,False,0          |
| k__Bacteria | p__Actinobacteria  | c__Actinobacteria       | o__Actinomycetales   | f__Micrococcaceae,False,0             |

|             |                    |                     |                        |                                  |
|-------------|--------------------|---------------------|------------------------|----------------------------------|
| k__Bacteria | p__Actinobacteria  | c__Actinobacteria   | o__Actinomycetales     | f__Micromonosporaceae,False,0    |
| k__Bacteria | p__Actinobacteria  | c__Actinobacteria   | o__Actinomycetales     | f__Mycobacteriaceae,False,0      |
| k__Bacteria | p__Actinobacteria  | c__Actinobacteria   | o__Actinomycetales     | f__Nocardiaceae,False,0          |
| k__Bacteria | p__Actinobacteria  | c__Actinobacteria   | o__Actinomycetales     | f__Nocardioideae,False,0         |
| k__Bacteria | p__Actinobacteria  | c__Actinobacteria   | o__Actinomycetales     | f__Promicromonosporaceae,False,0 |
| k__Bacteria | p__Actinobacteria  | c__Actinobacteria   | o__Actinomycetales     | f__Pseudonocardiaceae,False,0    |
| k__Bacteria | p__Actinobacteria  | c__Actinobacteria   | o__Actinomycetales     | f__Streptomycetaceae,False,0     |
| k__Bacteria | p__Actinobacteria  | c__Actinobacteria   | o__Actinomycetales     | f__Streptosporangiaceae,False,0  |
| k__Bacteria | p__Actinobacteria  | c__Actinobacteria   | o__Actinomycetales     | f__Thermomonosporaceae,False,0   |
| k__Bacteria | p__Actinobacteria  | c__Actinobacteria   | o__Micrococcales       | f__,False,0                      |
| k__Bacteria | p__Actinobacteria  | c__MB-A2-108        | o__0319-7L14           | f__,False,0                      |
| k__Bacteria | p__Actinobacteria  | c__MB-A2-108        | o__                    | f__,False,0                      |
| k__Bacteria | p__Actinobacteria  | c__Nitriliruptoria  | o__Euzebyales          | f__Euzebyaceae,False,0           |
| k__Bacteria | p__Actinobacteria  | c__Rubrobacteria    | o__Rubrobacterales     | f__Rubrobacteraceae,False,0      |
| k__Bacteria | p__Actinobacteria  | c__Thermoleophilia  | __                     | __,False,0                       |
| k__Bacteria | p__Actinobacteria  | c__Thermoleophilia  | o__Gaiellales          | __,False,0                       |
| k__Bacteria | p__Actinobacteria  | c__Thermoleophilia  | o__Gaiellales          | f__,False,0                      |
| k__Bacteria | p__Actinobacteria  | c__Thermoleophilia  | o__Gaiellales          | f__AK1AB1_02E,False,0            |
| k__Bacteria | p__Actinobacteria  | c__Thermoleophilia  | o__Gaiellales          | f__Gaiellaceae,False,0           |
| k__Bacteria | p__Actinobacteria  | c__Thermoleophilia  | o__Solirubrobacterales | __,False,0                       |
| k__Bacteria | p__Actinobacteria  | c__Thermoleophilia  | o__Solirubrobacterales | f__,False,0                      |
| k__Bacteria | p__Actinobacteria  | c__Thermoleophilia  | o__Solirubrobacterales | f__Conexibacteraceae,False,0     |
| k__Bacteria | p__Actinobacteria  | c__Thermoleophilia  | o__Solirubrobacterales | f__Solirubrobacteraceae,False,0  |
| k__Bacteria | p__Armatimonadetes | c__[Fimbriimonadia] | o__[Fimbriimonadales]  | __,False,0                       |
| k__Bacteria | p__Armatimonadetes | c__[Fimbriimonadia] | o__[Fimbriimonadales]  | f__,False,0                      |
| k__Bacteria | p__Armatimonadetes | c__[Fimbriimonadia] | o__[Fimbriimonadales]  | f__[Fimbriimonadaceae],False,0   |
| k__Bacteria | p__BRC1            | c__PRR-11           | o__                    | f__,False,0                      |
| k__Bacteria | p__Bacteroidetes   | __                  | __                     | __,False,0                       |
| k__Bacteria | p__Bacteroidetes   | c__Bacteroidia      | o__Bacteroidales       | f__Bacteroidaceae,False,0        |
| k__Bacteria | p__Bacteroidetes   | c__Bacteroidia      | o__Bacteroidales       | f__Prevotellaceae,False,0        |
| k__Bacteria | p__Bacteroidetes   | c__Bacteroidia      | o__Bacteroidales       | f__[Paraprevotellaceae],False,0  |
| k__Bacteria | p__Bacteroidetes   | c__Cytophagia       | o__Cytophagales        | __,False,0                       |
| k__Bacteria | p__Bacteroidetes   | c__Cytophagia       | o__Cytophagales        | f__Cytophagaceae,False,0         |
| k__Bacteria | p__Bacteroidetes   | c__Cytophagia       | o__Cytophagales        | f__[Amoebophilaceae],False,0     |
| k__Bacteria | p__Bacteroidetes   | c__Flavobacteriia   | o__Flavobacteriales    | __,False,0                       |
| k__Bacteria | p__Bacteroidetes   | c__Flavobacteriia   | o__Flavobacteriales    | f__Cryomorphaceae,False,0        |
| k__Bacteria | p__Bacteroidetes   | c__Flavobacteriia   | o__Flavobacteriales    | f__[Weeksellaceae],False,0       |
| k__Bacteria | p__Bacteroidetes   | c__Sphingobacteriia | o__Sphingobacteriales  | __,False,0                       |
| k__Bacteria | p__Bacteroidetes   | c__Sphingobacteriia | o__Sphingobacteriales  | f__,False,0                      |
| k__Bacteria | p__Bacteroidetes   | c__Sphingobacteriia | o__Sphingobacteriales  | f__Sphingobacteriaceae,False,0   |
| k__Bacteria | p__Bacteroidetes   | c__VC2_1_Bac22      | o__                    | f__,False,0                      |
| k__Bacteria | p__Bacteroidetes   | c__[Saprospirae]    | o__[Saprospirales]     | __,False,0                       |
| k__Bacteria | p__Bacteroidetes   | c__[Saprospirae]    | o__[Saprospirales]     | f__,False,0                      |
| k__Bacteria | p__Bacteroidetes   | c__[Saprospirae]    | o__[Saprospirales]     | f__Chitinophagaceae,False,0      |
| k__Bacteria | p__Bacteroidetes   | c__[Saprospirae]    | o__[Saprospirales]     | f__Saprospiraceae,False,0        |
| k__Bacteria | p__Chlamydiae      | c__Chlamydiia       | o__Chlamydiales        | __,False,0                       |
| k__Bacteria | p__Chlamydiae      | c__Chlamydiia       | o__Chlamydiales        | f__,False,0                      |
| k__Bacteria | p__Chlamydiae      | c__Chlamydiia       | o__Chlamydiales        | f__Parachlamydiaceae,False,0     |
| k__Bacteria | p__Chlamydiae      | c__Chlamydiia       | o__Chlamydiales        | f__Rhabdochlamydiaceae,False,0   |
| k__Bacteria | p__Chlorobi        | c__                 | o__                    | f__,False,0                      |
| k__Bacteria | p__Chlorobi        | c__BSV26            | o__A89                 | f__,False,0                      |
| k__Bacteria | p__Chlorobi        | c__BSV26            | o__C20                 | f__,False,0                      |
| k__Bacteria | p__Chlorobi        | c__BSV26            | o__PK329               | f__,False,0                      |
| k__Bacteria | p__Chlorobi        | c__SJA-28           | o__                    | f__,False,0                      |
| k__Bacteria | p__Chloroflexi     | __                  | __                     | __,False,0                       |
| k__Bacteria | p__Chloroflexi     | c__                 | o__                    | f__,False,0                      |
| k__Bacteria | p__Chloroflexi     | c__Anaerolineae     | __                     | __,False,0                       |
| k__Bacteria | p__Chloroflexi     | c__Anaerolineae     | o__A31                 | f__,False,0                      |
| k__Bacteria | p__Chloroflexi     | c__Anaerolineae     | o__A31                 | f__S47,False,0                   |
| k__Bacteria | p__Chloroflexi     | c__Anaerolineae     | o__CFB-26              | f__,False,0                      |
| k__Bacteria | p__Chloroflexi     | c__Anaerolineae     | o__Caldilineales       | f__Caldilineaceae,False,0        |
| k__Bacteria | p__Chloroflexi     | c__Anaerolineae     | o__GCA004              | f__,False,0                      |
| k__Bacteria | p__Chloroflexi     | c__Anaerolineae     | o__H39                 | f__,False,0                      |
| k__Bacteria | p__Chloroflexi     | c__Anaerolineae     | o__S0208               | f__,False,0                      |
| k__Bacteria | p__Chloroflexi     | c__Anaerolineae     | o__SB-34               | f__,False,0                      |
| k__Bacteria | p__Chloroflexi     | c__Anaerolineae     | o__SBR1031             | f__A4b,False,0                   |
| k__Bacteria | p__Chloroflexi     | c__Anaerolineae     | o__SBR1031             | f__oc28,False,0                  |
| k__Bacteria | p__Chloroflexi     | c__Anaerolineae     | o__envOPS12            | f__,False,0                      |
| k__Bacteria | p__Chloroflexi     | c__Anaerolineae     | o__pLW-97              | f__,False,0                      |
| k__Bacteria | p__Chloroflexi     | c__Chloroflexi      | o__[Roseiflexales]     | __,False,0                       |
| k__Bacteria | p__Chloroflexi     | c__Chloroflexi      | o__[Roseiflexales]     | f__[Kouleothrixaceae],False,0    |

|             |                     |                       |                           |                                    |
|-------------|---------------------|-----------------------|---------------------------|------------------------------------|
| k__Bacteria | p__Chloroflexi      | c__Ellin6529          | o__                       | f__False,0                         |
| k__Bacteria | p__Chloroflexi      | c__Gitt-GS-136        | o__                       | f__False,1                         |
| k__Bacteria | p__Chloroflexi      | c__Ktedonobacteria    | __                        | __,False,0                         |
| k__Bacteria | p__Chloroflexi      | c__Ktedonobacteriales | o__Ktedonobacteriales     | f__Ktedonobacteraceae,False,0      |
| k__Bacteria | p__Chloroflexi      | c__Ktedonobacteria    | o__Thermogemmatissporales | f__Thermogemmatissporaceae,False,0 |
| k__Bacteria | p__Chloroflexi      | c__P2-11E             | o__                       | f__False,0                         |
| k__Bacteria | p__Chloroflexi      | c__S085               | o__                       | f__False,0                         |
| k__Bacteria | p__Chloroflexi      | c__SAR202             | o__                       | f__False,0                         |
| k__Bacteria | p__Chloroflexi      | c__TK10               | __                        | __,False,0                         |
| k__Bacteria | p__Chloroflexi      | c__TK10               | o__                       | f__False,0                         |
| k__Bacteria | p__Chloroflexi      | c__TK10               | o__AKYG885                | __,False,0                         |
| k__Bacteria | p__Chloroflexi      | c__TK10               | o__AKYG885                | f__False,0                         |
| k__Bacteria | p__Chloroflexi      | c__TK10               | o__AKYG885                | f__5B-12,False,0                   |
| k__Bacteria | p__Chloroflexi      | c__TK10               | o__AKYG885                | f__Dolo_23,False,0                 |
| k__Bacteria | p__Chloroflexi      | c__TK10               | o__B07_WMSP1              | __,False,0                         |
| k__Bacteria | p__Chloroflexi      | c__TK10               | o__B07_WMSP1              | f__False,0                         |
| k__Bacteria | p__Chloroflexi      | c__TK17               | o__                       | f__False,0                         |
| k__Bacteria | p__Chloroflexi      | c__TK17               | o__mle1-48                | f__False,0                         |
| k__Bacteria | p__Chloroflexi      | c__Thermomicrobia     | __                        | __,False,0                         |
| k__Bacteria | p__Chloroflexi      | c__Thermomicrobia     | o__JG30-KF-CM45           | f__False,0                         |
| k__Bacteria | p__Cyanobacteria    | c__4C0d-2             | o__MLE1-12                | f__False,0                         |
| k__Bacteria | p__Cyanobacteria    | c__4C0d-2             | o__SM1D11                 | f__False,0                         |
| k__Bacteria | p__Cyanobacteria    | c__Chloroplast        | o__Stramenopiles          | f__False,0                         |
| k__Bacteria | p__Cyanobacteria    | c__Chloroplast        | o__Streptophyta           | f__False,0                         |
| k__Bacteria | p__Cyanobacteria    | c__ML635J-21          | o__                       | f__False,0                         |
| k__Bacteria | p__Elusimicrobia    | __                    | __                        | __,False,0                         |
| k__Bacteria | p__Elusimicrobia    | c__Elusimicrobia      | __                        | __,False,0                         |
| k__Bacteria | p__Elusimicrobia    | c__Elusimicrobia      | o__Elusimicrobiales       | f__False,0                         |
| k__Bacteria | p__Elusimicrobia    | c__Elusimicrobia      | o__FAC88                  | f__False,0                         |
| k__Bacteria | p__Elusimicrobia    | c__Elusimicrobia      | o__Ilb                    | f__False,0                         |
| k__Bacteria | p__Elusimicrobia    | c__Elusimicrobia      | o__MVP-88                 | f__False,0                         |
| k__Bacteria | p__Elusimicrobia    | c__Endomicrobia       | o__                       | f__False,0                         |
| k__Bacteria | p__Fibrobacteres    | c__Fibrobacteria      | o__258ds10                | f__False,0                         |
| k__Bacteria | p__Firmicutes       | __                    | __                        | __,False,0                         |
| k__Bacteria | p__Firmicutes       | c__Bacilli            | o__Bacillales             | __,False,0                         |
| k__Bacteria | p__Firmicutes       | c__Bacilli            | o__Bacillales             | f__Bacillaceae,False,0             |
| k__Bacteria | p__Firmicutes       | c__Bacilli            | o__Bacillales             | f__Paenibacillaceae,False,0        |
| k__Bacteria | p__Firmicutes       | c__Bacilli            | o__Bacillales             | f__Planococcaceae,False,0          |
| k__Bacteria | p__Firmicutes       | c__Bacilli            | o__Bacillales             | f__Staphylococcaceae,False,0       |
| k__Bacteria | p__Firmicutes       | c__Bacilli            | o__Bacillales             | f__Thermoactinomycetaceae,False,0  |
| k__Bacteria | p__Firmicutes       | c__Bacilli            | o__Lactobacillales        | f__Aerococcaceae,False,0           |
| k__Bacteria | p__Firmicutes       | c__Bacilli            | o__Lactobacillales        | f__Carnobacteriaceae,False,0       |
| k__Bacteria | p__Firmicutes       | c__Bacilli            | o__Lactobacillales        | f__Streptococcaceae,False,0        |
| k__Bacteria | p__Firmicutes       | c__Clostridia         | __                        | __,False,0                         |
| k__Bacteria | p__Firmicutes       | c__Clostridia         | o__Clostridiales          | __,False,0                         |
| k__Bacteria | p__Firmicutes       | c__Clostridia         | o__Clostridiales          | f__Clostridiaceae,False,0          |
| k__Bacteria | p__Firmicutes       | c__Clostridia         | o__Clostridiales          | f__Gracilibacteraceae,False,0      |
| k__Bacteria | p__Firmicutes       | c__Clostridia         | o__Clostridiales          | f__Lachnospiraceae,False,0         |
| k__Bacteria | p__Firmicutes       | c__Clostridia         | o__Clostridiales          | f__Peptococcaceae,False,0          |
| k__Bacteria | p__Firmicutes       | c__Clostridia         | o__Clostridiales          | f__Ruminococcaceae,False,0         |
| k__Bacteria | p__Firmicutes       | c__Clostridia         | o__Clostridiales          | f__Symbiobacteriaceae,False,0      |
| k__Bacteria | p__Firmicutes       | c__Clostridia         | o__Clostridiales          | f__Veillonellaceae,False,0         |
| k__Bacteria | p__Firmicutes       | c__Clostridia         | o__Clostridiales          | f__[Mogibacteriaceae],False,0      |
| k__Bacteria | p__Firmicutes       | c__Clostridia         | o__Clostridiales          | f__[Tissierellaceae],False,0       |
| k__Bacteria | p__Firmicutes       | c__Clostridia         | o__OPB54                  | f__False,0                         |
| k__Bacteria | p__GAL15            | c__                   | o__                       | f__False,0                         |
| k__Bacteria | p__GN02             | c__GKS2-174           | o__                       | f__False,0                         |
| k__Bacteria | p__GN04             | c__                   | o__                       | f__False,0                         |
| k__Bacteria | p__GN04             | c__GN15               | o__                       | f__False,0                         |
| k__Bacteria | p__GN04             | c__MSB-5A5            | o__                       | f__False,0                         |
| k__Bacteria | p__Gemmatimonadetes | __                    | __                        | __,False,0                         |
| k__Bacteria | p__Gemmatimonadetes | c__                   | o__                       | f__False,0                         |
| k__Bacteria | p__Gemmatimonadetes | c__Gemm-1             | o__                       | f__False,0                         |
| k__Bacteria | p__Gemmatimonadetes | c__Gemm-2             | o__                       | f__False,0                         |
| k__Bacteria | p__Gemmatimonadetes | c__Gemm-5             | o__                       | f__False,0                         |
| k__Bacteria | p__Gemmatimonadetes | c__Gemmatimonadetes   | __                        | __,False,0                         |
| k__Bacteria | p__Gemmatimonadetes | c__Gemmatimonadetes   | o__                       | f__False,0                         |
| k__Bacteria | p__Gemmatimonadetes | c__Gemmatimonadetes   | o__C114                   | f__False,0                         |
| k__Bacteria | p__Gemmatimonadetes | c__Gemmatimonadetes   | o__KD8-87                 | f__False,0                         |
| k__Bacteria | p__MVP-21           | c__                   | o__                       | f__False,0                         |
| k__Bacteria | p__NC10             | c__12-24              | o__MIZ17                  | f__False,0                         |

|             |                   |                        |                     |                                |
|-------------|-------------------|------------------------|---------------------|--------------------------------|
| k__Bacteria | p__NKB19          | c__                    | o__                 | f__False,0                     |
| k__Bacteria | p__NKB19          | c__TSBW08              | o__                 | f__False,0                     |
| k__Bacteria | p__Nitrospirae    | c__Nitrospira          | o__Nitrospirales    | __,False,0                     |
| k__Bacteria | p__Nitrospirae    | c__Nitrospirae         | o__Nitrospirales    | f__False,0                     |
| k__Bacteria | p__Nitrospirae    | c__Nitrospira          | o__Nitrospirales    | f__0319-6A21,False,0           |
| k__Bacteria | p__Nitrospirae    | c__Nitrospira          | o__Nitrospirales    | f__Nitrospiraceae,False,0      |
| k__Bacteria | p__Nitrospirae    | c__Nitrospira          | o__Nitrospirales    | f__[Leptospirillaceae],False,0 |
| k__Bacteria | p__OD1            | __                     | __                  | __,False,0                     |
| k__Bacteria | p__OD1            | c__ABY1                | o__                 | f__False,0                     |
| k__Bacteria | p__OD1            | c__Mb-NB09             | o__                 | f__False,0                     |
| k__Bacteria | p__OD1            | c__SM2F11              | o__                 | f__False,0                     |
| k__Bacteria | p__OD1            | c__ZB2                 | o__                 | f__False,0                     |
| k__Bacteria | p__OP11           | __                     | __                  | __,False,0                     |
| k__Bacteria | p__OP11           | c__WCHB1-64            | o__d153             | f__False,0                     |
| k__Bacteria | p__OP3            | c__PBS-25              | o__                 | f__False,0                     |
| k__Bacteria | p__OP3            | c__koll11              | o__                 | f__False,0                     |
| k__Bacteria | p__OP3            | c__koll11              | o__GIF10            | f__kjp58rc,False,0             |
| k__Bacteria | p__Planctomycetes | __                     | __                  | __,False,0                     |
| k__Bacteria | p__Planctomycetes | c__                    | o__                 | f__False,0                     |
| k__Bacteria | p__Planctomycetes | c__BD7-11              | o__                 | f__False,0                     |
| k__Bacteria | p__Planctomycetes | c__OM190               | o__CL500-15         | f__False,0                     |
| k__Bacteria | p__Planctomycetes | c__OM190               | o__agg27            | f__False,0                     |
| k__Bacteria | p__Planctomycetes | c__Phycisphaerae       | o__CCM11a           | f__False,0                     |
| k__Bacteria | p__Planctomycetes | c__Phycisphaerae       | o__Phycisphaerales  | __,False,0                     |
| k__Bacteria | p__Planctomycetes | c__Phycisphaerae       | o__Phycisphaerales  | f__False,0                     |
| k__Bacteria | p__Planctomycetes | c__Phycisphaerae       | o__Pla1             | f__False,0                     |
| k__Bacteria | p__Planctomycetes | c__Phycisphaerae       | o__S-70             | f__False,0                     |
| k__Bacteria | p__Planctomycetes | c__Phycisphaerae       | o__WD2101           | f__False,0                     |
| k__Bacteria | p__Planctomycetes | c__Pla3                | o__                 | f__False,0                     |
| k__Bacteria | p__Planctomycetes | c__Pla4                | o__                 | f__False,0                     |
| k__Bacteria | p__Planctomycetes | c__Planctomycetia      | __                  | __,False,0                     |
| k__Bacteria | p__Planctomycetes | c__Planctomycetia      | o__B97              | f__False,0                     |
| k__Bacteria | p__Planctomycetes | c__Planctomycetia      | o__Gemmatales       | __,False,0                     |
| k__Bacteria | p__Planctomycetes | c__Planctomycetia      | o__Gemmatales       | f__Gemmataceae,False,0         |
| k__Bacteria | p__Planctomycetes | c__Planctomycetia      | o__Gemmatales       | f__Isosphaeraeae,False,0       |
| k__Bacteria | p__Planctomycetes | c__Planctomycetia      | o__Pirellulales     | f__Pirellulaceae,False,1       |
| k__Bacteria | p__Planctomycetes | c__Planctomycetia      | o__Planctomycetales | f__Planctomycetaceae,False,0   |
| k__Bacteria | p__Proteobacteria | __                     | __                  | __,False,0                     |
| k__Bacteria | p__Proteobacteria | c__                    | o__                 | f__False,0                     |
| k__Bacteria | p__Proteobacteria | c__Alphaproteobacteria | __                  | __,False,0                     |
| k__Bacteria | p__Proteobacteria | c__Alphaproteobacteria | o__BD7-3            | f__False,0                     |
| k__Bacteria | p__Proteobacteria | c__Alphaproteobacteria | o__Caulobacterales  | f__Caulobacteraceae,False,0    |
| k__Bacteria | p__Proteobacteria | c__Alphaproteobacteria | o__Ellin329         | f__False,0                     |
| k__Bacteria | p__Proteobacteria | c__Alphaproteobacteria | o__Rhizobiales      | __,False,0                     |
| k__Bacteria | p__Proteobacteria | c__Alphaproteobacteria | o__Rhizobiales      | f__False,0                     |
| k__Bacteria | p__Proteobacteria | c__Alphaproteobacteria | o__Rhizobiales      | f__Bradyrhizobiaceae,False,0   |
| k__Bacteria | p__Proteobacteria | c__Alphaproteobacteria | o__Rhizobiales      | f__Brucellaceae,False,0        |
| k__Bacteria | p__Proteobacteria | c__Alphaproteobacteria | o__Rhizobiales      | f__Hyphomicrobiaceae,False,0   |
| k__Bacteria | p__Proteobacteria | c__Alphaproteobacteria | o__Rhizobiales      | f__Methylocystaceae,False,0    |
| k__Bacteria | p__Proteobacteria | c__Alphaproteobacteria | o__Rhizobiales      | f__Phyllobacteriaceae,False,0  |
| k__Bacteria | p__Proteobacteria | c__Alphaproteobacteria | o__Rhizobiales      | f__Rhizobiaceae,False,0        |
| k__Bacteria | p__Proteobacteria | c__Alphaproteobacteria | o__Rhizobiales      | f__Rhodobacteraceae,False,0    |
| k__Bacteria | p__Proteobacteria | c__Alphaproteobacteria | o__Rhizobiales      | f__Xanthobacteraceae,False,0   |
| k__Bacteria | p__Proteobacteria | c__Alphaproteobacteria | o__Rhodobacterales  | f__Hyphomonadaceae,False,0     |
| k__Bacteria | p__Proteobacteria | c__Alphaproteobacteria | o__Rhodobacterales  | f__Rhodobacteraceae,False,0    |
| k__Bacteria | p__Proteobacteria | c__Alphaproteobacteria | o__Rhodospirillales | __,False,0                     |
| k__Bacteria | p__Proteobacteria | c__Alphaproteobacteria | o__Rhodospirillales | f__False,0                     |
| k__Bacteria | p__Proteobacteria | c__Alphaproteobacteria | o__Rhodospirillales | f__Acetobacteraceae,False,0    |
| k__Bacteria | p__Proteobacteria | c__Alphaproteobacteria | o__Rhodospirillales | f__Rhodospirillaceae,False,0   |
| k__Bacteria | p__Proteobacteria | c__Alphaproteobacteria | o__Rickettsiales    | f__False,0                     |
| k__Bacteria | p__Proteobacteria | c__Alphaproteobacteria | o__Rickettsiales    | f__Holosporaceae,False,0       |
| k__Bacteria | p__Proteobacteria | c__Alphaproteobacteria | o__Rickettsiales    | f__Rickettsiaceae,False,0      |
| k__Bacteria | p__Proteobacteria | c__Alphaproteobacteria | o__Rickettsiales    | f__mitochondria,False,0        |
| k__Bacteria | p__Proteobacteria | c__Alphaproteobacteria | o__Sphingomonadales | __,False,0                     |
| k__Bacteria | p__Proteobacteria | c__Alphaproteobacteria | o__Sphingomonadales | f__Erythrobacteraceae,False,0  |
| k__Bacteria | p__Proteobacteria | c__Alphaproteobacteria | o__Sphingomonadales | f__Sphingomonadaceae,False,0   |
| k__Bacteria | p__Proteobacteria | c__Betaproteobacteria  | __                  | __,False,0                     |
| k__Bacteria | p__Proteobacteria | c__Betaproteobacteria  | o__                 | f__False,0                     |
| k__Bacteria | p__Proteobacteria | c__Betaproteobacteria  | o__A21b             | f__EB1003,False,0              |
| k__Bacteria | p__Proteobacteria | c__Betaproteobacteria  | o__Burkholderiales  | __,False,0                     |
| k__Bacteria | p__Proteobacteria | c__Betaproteobacteria  | o__Burkholderiales  | f__False,0                     |

|             |                   |                         |                        |                                 |
|-------------|-------------------|-------------------------|------------------------|---------------------------------|
| k__Bacteria | p__Proteobacteria | c__Betaproteobacteria   | o__Burkholderiales     | f__Alcaligenaceae,False,0       |
| k__Bacteria | p__Proteobacteria | c__Betaproteobacteria   | o__Burkholderiales     | f__Burkholderiaceae,False,0     |
| k__Bacteria | p__Proteobacteria | c__Betaproteobacteria   | o__Burkholderiales     | f__Comamonadaceae,False,0       |
| k__Bacteria | p__Proteobacteria | c__Betaproteobacteria   | o__Burkholderiales     | f__Oxalobacteraceae,False,0     |
| k__Bacteria | p__Proteobacteria | c__Betaproteobacteria   | o__Ellin6067           | f__,False,0                     |
| k__Bacteria | p__Proteobacteria | c__Betaproteobacteria   | o__IS-44               | f__,False,0                     |
| k__Bacteria | p__Proteobacteria | c__Betaproteobacteria   | o__MND1                | f__,False,0                     |
| k__Bacteria | p__Proteobacteria | c__Betaproteobacteria   | o__Methylophilales     | f__Methylophilaceae,False,0     |
| k__Bacteria | p__Proteobacteria | c__Betaproteobacteria   | o__Neisseriales        | f__Neisseriaceae,False,0        |
| k__Bacteria | p__Proteobacteria | c__Betaproteobacteria   | o__Procabacteriales    | f__Procabacteriaceae,False,0    |
| k__Bacteria | p__Proteobacteria | c__Betaproteobacteria   | o__SC-I-84             | f__,False,0                     |
| k__Bacteria | p__Proteobacteria | c__Deltaproteobacteria  | _                      | __,False,0                      |
| k__Bacteria | p__Proteobacteria | c__Deltaproteobacteria  | o__Bdellovibrionales   | f__Bacteriovoracaceae,False,0   |
| k__Bacteria | p__Proteobacteria | c__Deltaproteobacteria  | o__Bdellovibrionales   | f__Bdellovibrionaceae,False,0   |
| k__Bacteria | p__Proteobacteria | c__Deltaproteobacteria  | o__Desulfuromonadales  | f__Geobacteraceae,False,0       |
| k__Bacteria | p__Proteobacteria | c__Deltaproteobacteria  | o__FAC87               | f__,False,0                     |
| k__Bacteria | p__Proteobacteria | c__Deltaproteobacteria  | o__GMD14H09            | f__,False,0                     |
| k__Bacteria | p__Proteobacteria | c__Deltaproteobacteria  | o__MIZ46               | f__,False,0                     |
| k__Bacteria | p__Proteobacteria | c__Deltaproteobacteria  | o__Myxococcales        | __,False,0                      |
| k__Bacteria | p__Proteobacteria | c__Deltaproteobacteria  | o__Myxococcales        | f__,False,0                     |
| k__Bacteria | p__Proteobacteria | c__Deltaproteobacteria  | o__Myxococcales        | f__0319-6G20,False,0            |
| k__Bacteria | p__Proteobacteria | c__Deltaproteobacteria  | o__Myxococcales        | f__Cystobacteraceae,False,0     |
| k__Bacteria | p__Proteobacteria | c__Deltaproteobacteria  | o__Myxococcales        | f__Cystobacterineae,False,0     |
| k__Bacteria | p__Proteobacteria | c__Deltaproteobacteria  | o__Myxococcales        | f__Haliangiaceae,False,0        |
| k__Bacteria | p__Proteobacteria | c__Deltaproteobacteria  | o__Myxococcales        | f__Myxococcaceae,False,0        |
| k__Bacteria | p__Proteobacteria | c__Deltaproteobacteria  | o__Myxococcales        | f__Nannocystaceae,False,0       |
| k__Bacteria | p__Proteobacteria | c__Deltaproteobacteria  | o__Myxococcales        | f__OM27,False,0                 |
| k__Bacteria | p__Proteobacteria | c__Deltaproteobacteria  | o__Myxococcales        | f__Polyangiaceae,False,0        |
| k__Bacteria | p__Proteobacteria | c__Deltaproteobacteria  | o__NB1-j               | __,False,0                      |
| k__Bacteria | p__Proteobacteria | c__Deltaproteobacteria  | o__NB1-j               | f__,False,0                     |
| k__Bacteria | p__Proteobacteria | c__Deltaproteobacteria  | o__NB1-j               | f__JTB38,False,0                |
| k__Bacteria | p__Proteobacteria | c__Deltaproteobacteria  | o__NB1-j               | f__MND4,False,0                 |
| k__Bacteria | p__Proteobacteria | c__Deltaproteobacteria  | o__NB1-j               | f__NB1-i,False,0                |
| k__Bacteria | p__Proteobacteria | c__Deltaproteobacteria  | o__Spirobacillales     | f__,False,0                     |
| k__Bacteria | p__Proteobacteria | c__Deltaproteobacteria  | o__Sva0853             | f__JTB36,False,0                |
| k__Bacteria | p__Proteobacteria | c__Deltaproteobacteria  | o__Syntrophobacterales | __,False,0                      |
| k__Bacteria | p__Proteobacteria | c__Deltaproteobacteria  | o__Syntrophobacterales | f__Syntrophobacteraceae,False,0 |
| k__Bacteria | p__Proteobacteria | c__Deltaproteobacteria  | o__[Entotheonellales]  | f__[Entotheonellaceae],False,0  |
| k__Bacteria | p__Proteobacteria | c__Gammmaproteobacteria | _                      | __,False,0                      |
| k__Bacteria | p__Proteobacteria | c__Gammmaproteobacteria | o__Alteromonadales     | f__125ds10,False,0              |
| k__Bacteria | p__Proteobacteria | c__Gammmaproteobacteria | o__Alteromonadales     | f__211ds20,False,0              |
| k__Bacteria | p__Proteobacteria | c__Gammmaproteobacteria | o__Chromatiales        | __,False,0                      |
| k__Bacteria | p__Proteobacteria | c__Gammmaproteobacteria | o__Enterobacteriales   | f__Enterobacteriaceae,False,0   |
| k__Bacteria | p__Proteobacteria | c__Gammmaproteobacteria | o__HTCC2188            | f__HTCC2089,False,0             |
| k__Bacteria | p__Proteobacteria | c__Gammmaproteobacteria | o__Legionellales       | __,False,0                      |
| k__Bacteria | p__Proteobacteria | c__Gammmaproteobacteria | o__Legionellales       | f__,False,0                     |
| k__Bacteria | p__Proteobacteria | c__Gammmaproteobacteria | o__Legionellales       | f__Coxiellaceae,False,0         |
| k__Bacteria | p__Proteobacteria | c__Gammmaproteobacteria | o__Legionellales       | f__Legionellaceae,False,0       |
| k__Bacteria | p__Proteobacteria | c__Gammmaproteobacteria | o__Oceanospirillales   | f__Halomonadaceae,False,0       |
| k__Bacteria | p__Proteobacteria | c__Gammmaproteobacteria | o__Pasteurellales      | f__Pasteurellaceae,False,0      |
| k__Bacteria | p__Proteobacteria | c__Gammmaproteobacteria | o__Pseudomonadales     | f__Moraxellaceae,False,0        |
| k__Bacteria | p__Proteobacteria | c__Gammmaproteobacteria | o__Pseudomonadales     | f__Pseudomonadaceae,False,0     |
| k__Bacteria | p__Proteobacteria | c__Gammmaproteobacteria | o__Thiotrichales       | f__Piscirickettsiaceae,False,0  |
| k__Bacteria | p__Proteobacteria | c__Gammmaproteobacteria | o__Vibrionales         | f__Vibrionaceae,False,0         |
| k__Bacteria | p__Proteobacteria | c__Gammmaproteobacteria | o__Xanthomonadales     | f__Sinobacteraceae,False,0      |
| k__Bacteria | p__Proteobacteria | c__Gammmaproteobacteria | o__Xanthomonadales     | f__Xanthomonadaceae,False,0     |
| k__Bacteria | p__SBR1093        | c__TA18                 | o__PHOS-HD29           | f__,False,0                     |
| k__Bacteria | p__Spirochaetes   | c__                     | o__                    | f__,False,0                     |
| k__Bacteria | p__TM6            | c__[Leptospirae]        | o__[Leptospirales]     | f__Leptospiraceae,False,0       |
| k__Bacteria | p__TM6            | _                       | _                      | __,False,0                      |
| k__Bacteria | p__TM6            | c__SBRH58               | o__                    | f__,False,0                     |
| k__Bacteria | p__TM6            | c__SJA-4                | o__                    | f__,False,0                     |
| k__Bacteria | p__TM6            | c__SJA-4                | o__                    | f__,False,0                     |
| k__Bacteria | p__TM6            | c__SJA-4                | o__S1198               | f__,False,0                     |
| k__Bacteria | p__TM6            | c__SJA-4                | o__YJF2-48             | f__,False,0                     |
| k__Bacteria | p__TM7            | _                       | _                      | __,False,0                      |
| k__Bacteria | p__TM7            | c__                     | o__                    | f__,False,0                     |
| k__Bacteria | p__TM7            | c__MJK10                | o__                    | f__,False,0                     |
| k__Bacteria | p__TM7            | c__SC3                  | o__                    | f__,False,0                     |
| k__Bacteria | p__TM7            | c__TM7-1                | o__                    | f__,False,0                     |
| k__Bacteria | p__TM7            | c__TM7-3                | o__                    | f__,False,0                     |

|             |                    |                        |                         |                                  |
|-------------|--------------------|------------------------|-------------------------|----------------------------------|
| k__Bacteria | p__TM7             | c__TM7-3               | o__EW055                | f__,False,0                      |
| k__Bacteria | p__TM7             | c__TM7-3               | o__I025                 | f__,False,0                      |
| k__Bacteria | p__Tenericutes     | c__Mollicutes          | o__Anaeroplasmatales    | f__Anaeroplasmataceae,False,0    |
| k__Bacteria | p__Verrucomicrobia | —                      | —                       | __,False,0                       |
| k__Bacteria | p__Verrucomicrobia | c__Opitutae            | o__HA64                 | f__,False,0                      |
| k__Bacteria | p__Verrucomicrobia | c__Opitutae            | o__Opitutales           | f__Opitutaceae,False,0           |
| k__Bacteria | p__Verrucomicrobia | c__Verrucomicrobiae    | o__Verrucomicrobiales   | f__Verrucomicrobiaceae,False,0   |
| k__Bacteria | p__Verrucomicrobia | c__[Methylacidiphilae] | o__Methylacidiphilales  | f__LD19,False,0                  |
| k__Bacteria | p__Verrucomicrobia | c__[Methylacidiphilae] | o__S-BQ2-57             | f__,False,0                      |
| k__Bacteria | p__Verrucomicrobia | c__[Pedosphaerae]      | o__[Pedosphaerales]     | __,False,0                       |
| k__Bacteria | p__Verrucomicrobia | c__[Pedosphaerae]      | o__[Pedosphaerales]     | f__,False,0                      |
| k__Bacteria | p__Verrucomicrobia | c__[Pedosphaerae]      | o__[Pedosphaerales]     | f__Ellin515,False,0              |
| k__Bacteria | p__Verrucomicrobia | c__[Pedosphaerae]      | o__[Pedosphaerales]     | f__Ellin517,False,0              |
| k__Bacteria | p__Verrucomicrobia | c__[Pedosphaerae]      | o__[Pedosphaerales]     | f__OPB35,False,0                 |
| k__Bacteria | p__Verrucomicrobia | c__[Pedosphaerae]      | o__[Pedosphaerales]     | f__auto67_4W,False,0             |
| k__Bacteria | p__Verrucomicrobia | c__[Spartobacteria]    | o__[Chthoniobacterales] | f__[Chthoniobacteraceae],False,0 |
| k__Bacteria | p__WS2             | c__SHA-109             | o__                     | f__,False,0                      |
| k__Bacteria | p__WS3             | c__PRR-12              | o__LD1-PA13             | f__,False,0                      |
| k__Bacteria | p__WS3             | c__PRR-12              | o__Sediment-1           | f__,False,0                      |
| k__Bacteria | p__WS3             | c__PRR-12              | o__Sediment-1           | f__PRR-10,False,0                |
| k__Bacteria | p__WS3             | c__PRR-12              | o__wb1_H11              | f__,False,0                      |
| k__Bacteria | p__WS6             | c__B142                | o__                     | f__,False,0                      |
| k__Bacteria | p__[Caldithrix]    | c__KSB1                | o__Ucn15732             | f__,False,0                      |
