# Supplementary material for: Quantitative and qualitative evaluation of the impact of the G2 enhancer, bead sizes and lysing tubes on the bacterial community composition during DNA extraction from recalcitrant soil core samples based on community sequencing and qPCR
Source: PubMed Central journal article supplement (PMC6459482; doi:10.1371/journal.pone.0200979), 2019-04-11
Supplement: pone.0200979.s008.pdf [file pone.0200979.s008.pdf]

**S8 Table. ANCOM summary based on beads comparison.**

,Reject null hypothesis,W

|             |                    |                         |                      |                                        |
|-------------|--------------------|-------------------------|----------------------|----------------------------------------|
| Unassigned  | —                  | —                       | —                    | __,False,10                            |
| k__Archaea  | —                  | —                       | —                    | __,False,0                             |
| k__Archaea  | p__Crenarchaeota   | c__MBGA                 | o__                  | f__,False,2                            |
| k__Archaea  | p__Crenarchaeota   | c__Thaumarchaeota       | o__AK31              | f__,False,0                            |
| k__Archaea  | p__Crenarchaeota   | c__Thaumarchaeota       | o__Cenarchaeales     | __,False,7                             |
| k__Archaea  | p__Crenarchaeota   | c__Thaumarchaeota       | o__Cenarchaeales     | f__,False,0                            |
| k__Archaea  | p__Crenarchaeota   | c__Thaumarchaeota       | o__Cenarchaeales     | f__Cenarchaeaceae,False,37             |
| k__Archaea  | p__Crenarchaeota   | c__Thaumarchaeota       | o__Nitrososphaerales | f__Nitrososphaeraceae,False,11         |
| k__Archaea  | p__Euryarchaeota   | —                       | —                    | __,False,0                             |
| k__Archaea  | p__Euryarchaeota   | c__Thermoplasmata       | o__E2                | __,False,0                             |
| k__Archaea  | p__Euryarchaeota   | c__Thermoplasmata       | o__E2                | f__TMEG,False,4                        |
| k__Archaea  | p__Euryarchaeota   | c__Thermoplasmata       | o__E2                | f__[Methanomassiliicoccaceae],False,28 |
| k__Archaea  | p__[Parvarchaeota] | c__[Parvarchaea]        | o__WCHD3-30          | f__,False,4                            |
| k__Archaea  | p__[Parvarchaeota] | c__[Parvarchaea]        | o__YLA114            | f__,False,2                            |
| k__Bacteria | —                  | —                       | —                    | __,False,15                            |
| k__Bacteria | p__Acidobacteria   | —                       | —                    | __,False,11                            |
| k__Bacteria | p__Acidobacteria   | c__                     | o__                  | f__,False,0                            |
| k__Bacteria | p__Acidobacteria   | c__Acidobacteria-5      | o__                  | f__,False,7                            |
| k__Bacteria | p__Acidobacteria   | c__Acidobacteria-6      | —                    | __,False,0                             |
| k__Bacteria | p__Acidobacteria   | c__Acidobacteria-6      | o__BPC015            | f__,False,0                            |
| k__Bacteria | p__Acidobacteria   | c__Acidobacteria-6      | o__CCU21             | f__,False,6                            |
| k__Bacteria | p__Acidobacteria   | c__Acidobacteria-6      | o__iii1-15           | __,False,0                             |
| k__Bacteria | p__Acidobacteria   | c__Acidobacteria-6      | o__iii1-15           | f__,False,25                           |
| k__Bacteria | p__Acidobacteria   | c__Acidobacteria-6      | o__iii1-15           | f__RB40,False,0                        |
| k__Bacteria | p__Acidobacteria   | c__Acidobacteria-6      | o__iii1-15           | f__mb2424,False,3                      |
| k__Bacteria | p__Acidobacteria   | c__Acidobacteriia       | o__Acidobacteriales  | f__Koribacteraceae,False,1             |
| k__Bacteria | p__Acidobacteria   | c__BPC102               | o__                  | f__,False,1                            |
| k__Bacteria | p__Acidobacteria   | c__BPC102               | o__B110              | f__,False,8                            |
| k__Bacteria | p__Acidobacteria   | c__BPC102               | o__MVS-40            | f__,True,127                           |
| k__Bacteria | p__Acidobacteria   | c__DA052                | o__E29               | f__,False,2                            |
| k__Bacteria | p__Acidobacteria   | c__DA052                | o__Ellin6513         | f__,False,0                            |
| k__Bacteria | p__Acidobacteria   | c__EC1113               | o__                  | f__,False,2                            |
| k__Bacteria | p__Acidobacteria   | c__PAUC37f              | o__                  | f__,False,7                            |
| k__Bacteria | p__Acidobacteria   | c__S035                 | o__                  | f__,False,14                           |
| k__Bacteria | p__Acidobacteria   | c__Solibacteres         | o__JH-WHS99          | f__,False,0                            |
| k__Bacteria | p__Acidobacteria   | c__Solibacteres         | o__Solibacterales    | __,False,1                             |
| k__Bacteria | p__Acidobacteria   | c__Solibacteres         | o__Solibacterales    | f__,False,8                            |
| k__Bacteria | p__Acidobacteria   | c__Solibacteres         | o__Solibacterales    | f__PAUC26f,False,0                     |
| k__Bacteria | p__Acidobacteria   | c__Solibacteres         | o__Solibacterales    | f__Solibacteraceae,False,8             |
| k__Bacteria | p__Acidobacteria   | c__Sva0725              | o__Sva0725           | f__,True,107                           |
| k__Bacteria | p__Acidobacteria   | c__[Chloracidobacteria] | —                    | __,False,1                             |
| k__Bacteria | p__Acidobacteria   | c__[Chloracidobacteria] | o__11-24             | f__,False,61                           |
| k__Bacteria | p__Acidobacteria   | c__[Chloracidobacteria] | o__                  | f__,False,5                            |
| k__Bacteria | p__Acidobacteria   | c__[Chloracidobacteria] | o__PK29              | f__,False,6                            |
| k__Bacteria | p__Acidobacteria   | c__[Chloracidobacteria] | o__RB41              | __,False,6                             |
| k__Bacteria | p__Acidobacteria   | c__[Chloracidobacteria] | o__RB41              | f__,False,0                            |
| k__Bacteria | p__Acidobacteria   | c__[Chloracidobacteria] | o__RB41              | f__Ellin6075,False,2                   |
| k__Bacteria | p__Acidobacteria   | c__iii1-8               | o__32-20             | f__,False,7                            |
| k__Bacteria | p__Acidobacteria   | c__iii1-8               | o__DS-18             | f__,False,0                            |
| k__Bacteria | p__Actinobacteria  | —                       | —                    | __,False,1                             |
| k__Bacteria | p__Actinobacteria  | c__Acidimicrobiia       | o__Acidimicrobiales  | __,False,2                             |
| k__Bacteria | p__Actinobacteria  | c__Acidimicrobiia       | o__Acidimicrobiales  | f__,False,21                           |
| k__Bacteria | p__Actinobacteria  | c__Acidimicrobiia       | o__Acidimicrobiales  | f__AKIW874,False,17                    |
| k__Bacteria | p__Actinobacteria  | c__Acidimicrobiia       | o__Acidimicrobiales  | f__C111,False,0                        |
| k__Bacteria | p__Actinobacteria  | c__Acidimicrobiia       | o__Acidimicrobiales  | f__EB1017,False,5                      |
| k__Bacteria | p__Actinobacteria  | c__Acidimicrobiia       | o__Acidimicrobiales  | f__koll13,False,6                      |
| k__Bacteria | p__Actinobacteria  | c__Actinobacteria       | —                    | __,False,0                             |
| k__Bacteria | p__Actinobacteria  | c__Actinobacteria       | o__Actinomycetales   | __,False,0                             |
| k__Bacteria | p__Actinobacteria  | c__Actinobacteria       | o__Actinomycetales   | f__,False,7                            |
| k__Bacteria | p__Actinobacteria  | c__Actinobacteria       | o__Actinomycetales   | f__Actinosynnemataceae,False,4         |
| k__Bacteria | p__Actinobacteria  | c__Actinobacteria       | o__Actinomycetales   | f__Frankiaceae,False,0                 |
| k__Bacteria | p__Actinobacteria  | c__Actinobacteria       | o__Actinomycetales   | f__Glycomycetaceae,False,0             |
| k__Bacteria | p__Actinobacteria  | c__Actinobacteria       | o__Actinomycetales   | f__Microbacteriaceae,False,0           |
| k__Bacteria | p__Actinobacteria  | c__Actinobacteria       | o__Actinomycetales   | f__Micrococccaceae,False,2             |
| k__Bacteria | p__Actinobacteria  | c__Actinobacteria       | o__Actinomycetales   | f__Micromonosporaceae,False,0          |
| k__Bacteria | p__Actinobacteria  | c__Actinobacteria       | o__Actinomycetales   | f__Mycobacteriaceae,False,0            |
| k__Bacteria | p__Actinobacteria  | c__Actinobacteria       | o__Actinomycetales   | f__Nocardiaceae,False,0                |
| k__Bacteria | p__Actinobacteria  | c__Actinobacteria       | o__Actinomycetales   | f__Nocardiodaceae,False,1              |
| k__Bacteria | p__Actinobacteria  | c__Actinobacteria       | o__Actinomycetales   | f__Promicromonosporaceae,False,4       |

|            |                   |                    |                          |                                   |
|------------|-------------------|--------------------|--------------------------|-----------------------------------|
| k_Bacteria | p_Actinobacteria  | c_Actinobacteria   | o_Actinomycetales        | f_Pseudonocardiaceae,False,10     |
| k_Bacteria | p_Actinobacteria  | c_Actinobacteria   | o_Actinomycetales        | f_Streptomycetaceae,False,13      |
| k_Bacteria | p_Actinobacteria  | c_Actinobacteria   | o_Actinomycetales        | f_Streptosporangiaceae,False,0    |
| k_Bacteria | p_Actinobacteria  | c_Actinobacteria   | o_Micrococcales          | f__False,0                        |
| k_Bacteria | p_Actinobacteria  | c_MB-A2-108        | o_0319-7L14              | f__False,32                       |
| k_Bacteria | p_Actinobacteria  | c_MB-A2-108        | o__                      | f__False,5                        |
| k_Bacteria | p_Actinobacteria  | c_Nitriliruptoria  | o_Euzebyales             | f_Euzebyaceae,False,3             |
| k_Bacteria | p_Actinobacteria  | c_Rubrobacteria    | o_Rubrobacterales        | f_Rubrobacteraceae,False,5        |
| k_Bacteria | p_Actinobacteria  | c_Thermoleophilia  | __                       | f__False,2                        |
| k_Bacteria | p_Actinobacteria  | c_Thermoleophilia  | o_Gaiellales             | f__False,2                        |
| k_Bacteria | p_Actinobacteria  | c_Thermoleophilia  | o_Gaiellales             | f__False,14                       |
| k_Bacteria | p_Actinobacteria  | c_Thermoleophilia  | o_Gaiellales             | f_AK1AB1_02E,False,5              |
| k_Bacteria | p_Actinobacteria  | c_Thermoleophilia  | o_Gaiellales             | f_Gaiellaceae,False,8             |
| k_Bacteria | p_Actinobacteria  | c_Thermoleophiia   | o_Solirubrobacterales    | f__False,1                        |
| k_Bacteria | p_Actinobacteria  | c_Thermoleophiia   | o_Solirubrobacterales    | f__False,4                        |
| k_Bacteria | p_Actinobacteria  | c_Thermoleophiia   | o_Solirubrobacterales    | f_Conexibacteraceae,False,2       |
| k_Bacteria | p_Actinobacteria  | c_Thermoleophiia   | o_Solirubrobacterales    | f_Solirubrobacteraceae,False,4    |
| k_Bacteria | p_Armatimonadetes | c_[Fimbrimonadia]  | o_[Fimbrimonadales]      | f_[Fimbrimonadaceae],False,2      |
| k_Bacteria | p_BRC1            | c_PRR-11           | o__                      | f__False,3                        |
| k_Bacteria | p_Bacteroidetes   | __                 | __                       | f__False,34                       |
| k_Bacteria | p_Bacteroidetes   | c_Bacteroidia      | o_Bacteroidales          | f_Bacteroidaceae,False,1          |
| k_Bacteria | p_Bacteroidetes   | c_Bacteroidia      | o_Bacteroidales          | f_Prevotellaceae,False,4          |
| k_Bacteria | p_Bacteroidetes   | c_Cytophagia       | o_Cytophagales           | f_Cytophagaceae,False,12          |
| k_Bacteria | p_Bacteroidetes   | c_Cytophagia       | o_Cytophagales           | f_[Amoebophilaceae],False,6       |
| k_Bacteria | p_Bacteroidetes   | c_Flavobacteriia   | o_Flavobacteriales       | f__False,1                        |
| k_Bacteria | p_Bacteroidetes   | c_Flavobacteriia   | o_Flavobacteriales       | f_Cryomorphaceae,False,0          |
| k_Bacteria | p_Bacteroidetes   | c_Sphingobacteriia | o_Sphingobacteriales     | f__False,2                        |
| k_Bacteria | p_Bacteroidetes   | c_Sphingobacteriia | o_Sphingobacteriales     | f__False,7                        |
| k_Bacteria | p_Bacteroidetes   | c_Sphingobacteriia | o_Sphingobacteriales     | f_Sphingobacteriaceae,False,31    |
| k_Bacteria | p_Bacteroidetes   | c_VC2_1_Bac22      | o__                      | f__False,0                        |
| k_Bacteria | p_Bacteroidetes   | c_[Saprospirae]    | o_[Saprospirales]        | f__False,4                        |
| k_Bacteria | p_Bacteroidetes   | c_[Saprospirae]    | o_[Saprospirales]        | f__False,2                        |
| k_Bacteria | p_Bacteroidetes   | c_[Saprospirae]    | o_[Saprospirales]        | f_Chitinophagaceae,False,12       |
| k_Bacteria | p_Bacteroidetes   | c_[Saprospirae]    | o_[Saprospirales]        | f_Saprospiraceae,False,0          |
| k_Bacteria | p_Chlamydiae      | c_Chlamydiia       | o_Chlamydiales           | f__False,0                        |
| k_Bacteria | p_Chlamydiae      | c_Chlamydiia       | o_Chlamydiales           | f__False,18                       |
| k_Bacteria | p_Chlamydiae      | c_Chlamydiia       | o_Chlamydiales           | f_Parachlamydiaceae,False,2       |
| k_Bacteria | p_Chlamydiae      | c_Chlamydiia       | o_Chlamydiales           | f_Rhabdochlamydiaceae,False,2     |
| k_Bacteria | p_Chlorobi        | c__                | o__                      | f__False,0                        |
| k_Bacteria | p_Chlorobi        | c_BSV26            | o_A89                    | f__False,5                        |
| k_Bacteria | p_Chlorobi        | c_BSV26            | o_C20                    | f__False,0                        |
| k_Bacteria | p_Chlorobi        | c_BSV26            | o_PK329                  | f__False,0                        |
| k_Bacteria | p_Chlorobi        | c_SJA-28           | o__                      | f__False,2                        |
| k_Bacteria | p_Chloroflexi     | __                 | __                       | f__False,15                       |
| k_Bacteria | p_Chloroflexi     | c__                | o__                      | f__False,0                        |
| k_Bacteria | p_Chloroflexi     | c_Anaerolineae     | o_A31                    | f__False,1                        |
| k_Bacteria | p_Chloroflexi     | c_Anaerolineae     | o_A31                    | f_S47,False,2                     |
| k_Bacteria | p_Chloroflexi     | c_Anaerolineae     | o_Caldilineales          | f_Caldilineaceae,False,5          |
| k_Bacteria | p_Chloroflexi     | c_Anaerolineae     | o_GCA004                 | f__False,19                       |
| k_Bacteria | p_Chloroflexi     | c_Anaerolineae     | o_H39                    | f__False,2                        |
| k_Bacteria | p_Chloroflexi     | c_Anaerolineae     | o_S0208                  | f__False,8                        |
| k_Bacteria | p_Chloroflexi     | c_Anaerolineae     | o_SBR1031                | f_A4b,False,0                     |
| k_Bacteria | p_Chloroflexi     | c_Anaerolineae     | o_envOPS12               | f__False,0                        |
| k_Bacteria | p_Chloroflexi     | c_Chloroflexi      | o_[Roseiflexales]        | f_[Kouleothrixaceae],False,1      |
| k_Bacteria | p_Chloroflexi     | c_Ellin6529        | o__                      | f__False,4                        |
| k_Bacteria | p_Chloroflexi     | c_Gitt-GS-136      | o__                      | f__False,6                        |
| k_Bacteria | p_Chloroflexi     | c_Ktedonobacteria  | __                       | f__False,5                        |
| k_Bacteria | p_Chloroflexi     | c_Ktedonobacteria  | o_Ktedonobacterales      | f_Ktedonobacteraceae,False,1      |
| k_Bacteria | p_Chloroflexi     | c_Ktedonobacteria  | o_Thermogemmatissporales | f_Thermogemmatissporaceae,False,1 |
| k_Bacteria | p_Chloroflexi     | c_P2-11E           | o__                      | f__False,1                        |
| k_Bacteria | p_Chloroflexi     | c_S085             | o__                      | f__False,4                        |
| k_Bacteria | p_Chloroflexi     | c_SAR202           | o__                      | f__False,0                        |
| k_Bacteria | p_Chloroflexi     | c_TK10             | __                       | f__False,1                        |
| k_Bacteria | p_Chloroflexi     | c_TK10             | o__                      | f__False,5                        |
| k_Bacteria | p_Chloroflexi     | c_TK10             | o_AKYG885                | f__False,9                        |
| k_Bacteria | p_Chloroflexi     | c_TK10             | o_AKYG885                | f__False,0                        |
| k_Bacteria | p_Chloroflexi     | c_TK10             | o_AKYG885                | f_5B-12,False,0                   |
| k_Bacteria | p_Chloroflexi     | c_TK10             | o_AKYG885                | f_Dolo_23,False,1                 |
| k_Bacteria | p_Chloroflexi     | c_TK10             | o_B07_WMSP1              | f__False,4                        |
| k_Bacteria | p_Chloroflexi     | c_TK10             | o_B07_WMSP1              | f__False,2                        |
| k_Bacteria | p_Chloroflexi     | c_TK17             | o__                      | f__False,0                        |

|             |                     |                     |                     |                                     |
|-------------|---------------------|---------------------|---------------------|-------------------------------------|
| k__Bacteria | p__Chloroflexi      | c__TK17             | o__mle1-48          | f__False,0                          |
| k__Bacteria | p__Chloroflexi      | c__Thermomicrobia   | __                  | __False,1                           |
| k__Bacteria | p__Chloroflexi      | c__Thermomicrobia   | o__JG30-KF-CM45     | f__False,2                          |
| k__Bacteria | p__Cyanobacteria    | c__4C0d-2           | o__MLE1-12          | f__False,7                          |
| k__Bacteria | p__Cyanobacteria    | c__4C0d-2           | o__SM1D11           | f__False,0                          |
| k__Bacteria | p__Cyanobacteria    | c__Chloroplast      | o__Stramenopiles    | f__False,6                          |
| k__Bacteria | p__Cyanobacteria    | c__Chloroplast      | o__Streptophyta     | f__False,0                          |
| k__Bacteria | p__Cyanobacteria    | c__ML635J-21        | o__                 | f__False,0                          |
| k__Bacteria | p__Elusimicrobia    | __                  | __                  | __False,0                           |
| k__Bacteria | p__Elusimicrobia    | c__Elusimicrobia    | __                  | __False,0                           |
| k__Bacteria | p__Elusimicrobia    | c__Elusimicrobia    | o__Elusimicrobiales | f__False,0                          |
| k__Bacteria | p__Elusimicrobia    | c__Elusimicrobia    | o__FAC88            | f__False,0                          |
| k__Bacteria | p__Elusimicrobia    | c__Elusimicrobia    | o__Iib              | f__False,5                          |
| k__Bacteria | p__Elusimicrobia    | c__Elusimicrobia    | o__MVP-88           | f__False,5                          |
| k__Bacteria | p__Elusimicrobia    | c__Elusimicrobia    | o__                 | f__False,3                          |
| k__Bacteria | p__Fibrobacteres    | c__Fibrobacteria    | o__258ds10          | f__False,0                          |
| k__Bacteria | p__Firmicutes       | __                  | __                  | __False,4                           |
| k__Bacteria | p__Firmicutes       | c__Bacilli          | o__Bacillales       | __False,1                           |
| k__Bacteria | p__Firmicutes       | c__Bacilli          | o__Bacillales       | f__Bacillaceae,False,17             |
| k__Bacteria | p__Firmicutes       | c__Bacilli          | o__Bacillales       | f__Paenibacillaceae,False,18        |
| k__Bacteria | p__Firmicutes       | c__Bacilli          | o__Bacillales       | f__Planococcaceae,False,0           |
| k__Bacteria | p__Firmicutes       | c__Bacilli          | o__Bacillales       | f__Staphylococcaceae,False,0        |
| k__Bacteria | p__Firmicutes       | c__Bacilli          | o__Bacillales       | f__Thermoactinomycesetaceae,False,7 |
| k__Bacteria | p__Firmicutes       | c__Bacilli          | o__Lactobacillales  | f__Aerococcaceae,False,11           |
| k__Bacteria | p__Firmicutes       | c__Bacilli          | o__Lactobacillales  | f__Carnobacteriaceae,False,2        |
| k__Bacteria | p__Firmicutes       | c__Bacilli          | o__Lactobacillales  | f__Streptococcaceae,False,0         |
| k__Bacteria | p__Firmicutes       | c__Clostridia       | __                  | __False,1                           |
| k__Bacteria | p__Firmicutes       | c__Clostridia       | o__Clostridiales    | __False,46                          |
| k__Bacteria | p__Firmicutes       | c__Clostridia       | o__Clostridiales    | f__Clostridiaceae,False,44          |
| k__Bacteria | p__Firmicutes       | c__Clostridia       | o__Clostridiales    | f__Gracilibacteraceae,False,37      |
| k__Bacteria | p__Firmicutes       | c__Clostridia       | o__Clostridiales    | f__Lachnospiraceae,False,1          |
| k__Bacteria | p__Firmicutes       | c__Clostridia       | o__Clostridiales    | f__Peptococcaceae,False,19          |
| k__Bacteria | p__Firmicutes       | c__Clostridia       | o__Clostridiales    | f__Ruminococcaceae,False,0          |
| k__Bacteria | p__Firmicutes       | c__Clostridia       | o__Clostridiales    | f__Symbiobacteriaceae,False,0       |
| k__Bacteria | p__Firmicutes       | c__Clostridia       | o__Clostridiales    | f__Veillonellaceae,False,17         |
| k__Bacteria | p__Firmicutes       | c__Clostridia       | o__Clostridiales    | f__[Mogibacteriaceae],False,7       |
| k__Bacteria | p__Firmicutes       | c__Clostridia       | o__Clostridiales    | f__[Tissierellaceae],False,6        |
| k__Bacteria | p__Firmicutes       | c__Clostridia       | o__OPB54            | f__False,9                          |
| k__Bacteria | p__GAL15            | c__                 | o__                 | f__False,90                         |
| k__Bacteria | p__GN02             | c__GKS2-174         | o__                 | f__False,6                          |
| k__Bacteria | p__GN04             | c__GN15             | o__                 | f__False,8                          |
| k__Bacteria | p__GN04             | c__MSB-5A5          | o__                 | f__False,4                          |
| k__Bacteria | p__Gemmatimonadetes | __                  | __                  | __False,3                           |
| k__Bacteria | p__Gemmatimonadetes | c__                 | o__                 | f__False,40                         |
| k__Bacteria | p__Gemmatimonadetes | c__Gemm-1           | o__                 | f__False,2                          |
| k__Bacteria | p__Gemmatimonadetes | c__Gemm-2           | o__                 | f__True,103                         |
| k__Bacteria | p__Gemmatimonadetes | c__Gemm-5           | o__                 | f__False,0                          |
| k__Bacteria | p__Gemmatimonadetes | c__Gemmatimonadetes | __                  | __False,0                           |
| k__Bacteria | p__Gemmatimonadetes | c__Gemmatimonadetes | o__                 | f__False,1                          |
| k__Bacteria | p__Gemmatimonadetes | c__Gemmatimonadetes | o__C114             | f__False,4                          |
| k__Bacteria | p__Gemmatimonadetes | c__Gemmatimonadetes | o__KD8-87           | f__False,2                          |
| k__Bacteria | p__MVP-21           | c__                 | o__                 | f__False,3                          |
| k__Bacteria | p__NC10             | c__12-24            | o__MIZ17            | f__False,3                          |
| k__Bacteria | p__Nitrospirae      | c__Nitrospira       | o__Nitrospirales    | __False,5                           |
| k__Bacteria | p__Nitrospirae      | c__Nitrospira       | o__Nitrospirales    | f__False,0                          |
| k__Bacteria | p__Nitrospirae      | c__Nitrospira       | o__Nitrospirales    | f__0319-6A21,False,10               |
| k__Bacteria | p__Nitrospirae      | c__Nitrospira       | o__Nitrospirales    | f__Nitrospiraceae,False,22          |
| k__Bacteria | p__Nitrospirae      | c__Nitrospira       | o__Nitrospirales    | f__[Leptospirillaceae],False,0      |
| k__Bacteria | p__OD1              | __                  | __                  | __False,1                           |
| k__Bacteria | p__OD1              | c__ABY1             | o__                 | f__False,0                          |
| k__Bacteria | p__OD1              | c__Mb-NB09          | o__                 | f__False,5                          |
| k__Bacteria | p__OD1              | c__SM2F11           | o__                 | f__False,0                          |
| k__Bacteria | p__OD1              | c__ZB2              | o__                 | f__False,0                          |
| k__Bacteria | p__OP11             | c__WCHB1-64         | o__d153             | f__False,5                          |
| k__Bacteria | p__OP3              | c__PBS-25           | o__                 | f__False,2                          |
| k__Bacteria | p__OP3              | c__koll11           | o__                 | f__False,1                          |
| k__Bacteria | p__Planctomycetes   | __                  | __                  | __False,9                           |
| k__Bacteria | p__Planctomycetes   | c__BD7-11           | o__                 | f__False,4                          |
| k__Bacteria | p__Planctomycetes   | c__OM190            | o__CL500-15         | f__False,0                          |
| k__Bacteria | p__Planctomycetes   | c__OM190            | o__agg27            | f__False,5                          |
| k__Bacteria | p__Planctomycetes   | c__Phycisphaerae    | o__CCM11a           | f__False,2                          |

|             |                   |                        |                       |                                |
|-------------|-------------------|------------------------|-----------------------|--------------------------------|
| k__Bacteria | p__Planctomycetes | c__Phycisphaerae       | o__Phycisphaerales    | f__False,0                     |
| k__Bacteria | p__Planctomycetes | c__Phycisphaerae       | o__Pla1               | f__False,9                     |
| k__Bacteria | p__Planctomycetes | c__Phycisphaerae       | o__S-70               | f__False,9                     |
| k__Bacteria | p__Planctomycetes | c__Phycisphaerae       | o__WD2101             | f__False,10                    |
| k__Bacteria | p__Planctomycetes | c__Pla3                | o__                   | f__False,2                     |
| k__Bacteria | p__Planctomycetes | c__Pla4                | o__                   | f__False,6                     |
| k__Bacteria | p__Planctomycetes | c__Planctomycetia      | __                    | __False,0                      |
| k__Bacteria | p__Planctomycetes | c__Planctomycetia      | o__B97                | f__False,3                     |
| k__Bacteria | p__Planctomycetes | c__Planctomycetia      | o__Gemmatales         | __False,4                      |
| k__Bacteria | p__Planctomycetes | c__Planctomycetia      | o__Gemmatales         | f__Gemmataceae,False,24        |
| k__Bacteria | p__Planctomycetes | c__Planctomycetia      | o__Pirellulales       | f__Pirellulaceae,False,8       |
| k__Bacteria | p__Planctomycetes | c__Planctomycetia      | o__Planctomycetales   | f__Planctomycetaceae,False,6   |
| k__Bacteria | p__Proteobacteria | __                     | __                    | __False,1                      |
| k__Bacteria | p__Proteobacteria | c__                    | o__                   | f__False,0                     |
| k__Bacteria | p__Proteobacteria | c__Alphaproteobacteria | o__                   | __False,4                      |
| k__Bacteria | p__Proteobacteria | c__Alphaproteobacteria | o__BD7-3              | f__False,0                     |
| k__Bacteria | p__Proteobacteria | c__Alphaproteobacteria | o__Caulobacterales    | f__Caulobacteraceae,False,1    |
| k__Bacteria | p__Proteobacteria | c__Alphaproteobacteria | o__Ellin329           | f__False,0                     |
| k__Bacteria | p__Proteobacteria | c__Alphaproteobacteria | o__Rhizobiales        | __False,7                      |
| k__Bacteria | p__Proteobacteria | c__Alphaproteobacteria | o__Rhizobiales        | f__False,20                    |
| k__Bacteria | p__Proteobacteria | c__Alphaproteobacteria | o__Rhizobiales        | f__Bradyrhizobiaceae,False,6   |
| k__Bacteria | p__Proteobacteria | c__Alphaproteobacteria | o__Rhizobiales        | f__Hyphomicrobiaceae,False,8   |
| k__Bacteria | p__Proteobacteria | c__Alphaproteobacteria | o__Rhizobiales        | f__Methylocystaceae,False,3    |
| k__Bacteria | p__Proteobacteria | c__Alphaproteobacteria | o__Rhizobiales        | f__Phyllobacteriaceae,False,33 |
| k__Bacteria | p__Proteobacteria | c__Alphaproteobacteria | o__Rhizobiales        | f__Rhizobiaceae,False,0        |
| k__Bacteria | p__Proteobacteria | c__Alphaproteobacteria | o__Rhizobiales        | f__Rhodobiaceae,False,5        |
| k__Bacteria | p__Proteobacteria | c__Alphaproteobacteria | o__Rhizobiales        | f__Xanthobacteraceae,False,0   |
| k__Bacteria | p__Proteobacteria | c__Alphaproteobacteria | o__Rhodobacterales    | f__Hyphomonadaceae,False,12    |
| k__Bacteria | p__Proteobacteria | c__Alphaproteobacteria | o__Rhodobacterales    | f__Rhodobacteraceae,False,0    |
| k__Bacteria | p__Proteobacteria | c__Alphaproteobacteria | o__Rhodospirillales   | __False,1                      |
| k__Bacteria | p__Proteobacteria | c__Alphaproteobacteria | o__Rhodospirillales   | f__False,2                     |
| k__Bacteria | p__Proteobacteria | c__Alphaproteobacteria | o__Rhodospirillales   | f__Rhodospirillaceae,False,13  |
| k__Bacteria | p__Proteobacteria | c__Alphaproteobacteria | o__Rickettsiales      | f__False,1                     |
| k__Bacteria | p__Proteobacteria | c__Alphaproteobacteria | o__Rickettsiales      | f__Holosporaceae,False,4       |
| k__Bacteria | p__Proteobacteria | c__Alphaproteobacteria | o__Rickettsiales      | f__Rickettsiaceae,False,0      |
| k__Bacteria | p__Proteobacteria | c__Alphaproteobacteria | o__Sphingomonadales   | __False,0                      |
| k__Bacteria | p__Proteobacteria | c__Alphaproteobacteria | o__Sphingomonadales   | f__Erythrobacteraceae,False,0  |
| k__Bacteria | p__Proteobacteria | c__Alphaproteobacteria | o__Sphingomonadales   | f__Sphingomonadaceae,False,13  |
| k__Bacteria | p__Proteobacteria | c__Betaproteobacteria  | __                    | __False,6                      |
| k__Bacteria | p__Proteobacteria | c__Betaproteobacteria  | o__                   | f__False,1                     |
| k__Bacteria | p__Proteobacteria | c__Betaproteobacteria  | o__A21b               | f__EB1003,False,2              |
| k__Bacteria | p__Proteobacteria | c__Betaproteobacteria  | o__Burkholderiales    | __False,14                     |
| k__Bacteria | p__Proteobacteria | c__Betaproteobacteria  | o__Burkholderiales    | f__Burkholderiaceae,False,0    |
| k__Bacteria | p__Proteobacteria | c__Betaproteobacteria  | o__Burkholderiales    | f__Comamonadaceae,False,7      |
| k__Bacteria | p__Proteobacteria | c__Betaproteobacteria  | o__Burkholderiales    | f__Oxalobacteraceae,False,2    |
| k__Bacteria | p__Proteobacteria | c__Betaproteobacteria  | o__IS-44              | f__False,6                     |
| k__Bacteria | p__Proteobacteria | c__Betaproteobacteria  | o__MND1               | f__False,14                    |
| k__Bacteria | p__Proteobacteria | c__Betaproteobacteria  | o__Methylophilales    | f__Methylophilaceae,False,6    |
| k__Bacteria | p__Proteobacteria | c__Betaproteobacteria  | o__Neisseriales       | f__Neisseriaceae,False,0       |
| k__Bacteria | p__Proteobacteria | c__Betaproteobacteria  | o__Procabacteriales   | f__Procabacteriaceae,False,1   |
| k__Bacteria | p__Proteobacteria | c__Betaproteobacteria  | o__SC-I-84            | f__False,1                     |
| k__Bacteria | p__Proteobacteria | c__Deltaproteobacteria | __                    | __False,0                      |
| k__Bacteria | p__Proteobacteria | c__Deltaproteobacteria | o__Bdellovibrionales  | f__Bacteriovoracaceae,False,1  |
| k__Bacteria | p__Proteobacteria | c__Deltaproteobacteria | o__Bdellovibrionales  | f__Bdellovibrionaceae,False,9  |
| k__Bacteria | p__Proteobacteria | c__Deltaproteobacteria | o__Desulfuromonadales | f__Geobacteraceae,False,8      |
| k__Bacteria | p__Proteobacteria | c__Deltaproteobacteria | o__FAC87              | f__False,0                     |
| k__Bacteria | p__Proteobacteria | c__Deltaproteobacteria | o__MIZ46              | f__False,0                     |
| k__Bacteria | p__Proteobacteria | c__Deltaproteobacteria | o__Myxococcales       | __False,0                      |
| k__Bacteria | p__Proteobacteria | c__Deltaproteobacteria | o__Myxococcales       | f__False,4                     |
| k__Bacteria | p__Proteobacteria | c__Deltaproteobacteria | o__Myxococcales       | f__O319-6G20,False,0           |
| k__Bacteria | p__Proteobacteria | c__Deltaproteobacteria | o__Myxococcales       | f__Cystobacteraceae,False,0    |
| k__Bacteria | p__Proteobacteria | c__Deltaproteobacteria | o__Myxococcales       | f__Cystobacterineae,False,4    |
| k__Bacteria | p__Proteobacteria | c__Deltaproteobacteria | o__Myxococcales       | f__Haliangiaceae,False,0       |
| k__Bacteria | p__Proteobacteria | c__Deltaproteobacteria | o__Myxococcales       | f__Myxococcaceae,False,0       |
| k__Bacteria | p__Proteobacteria | c__Deltaproteobacteria | o__Myxococcales       | f__Nannocystaceae,False,1      |
| k__Bacteria | p__Proteobacteria | c__Deltaproteobacteria | o__Myxococcales       | f__OM27,False,1                |
| k__Bacteria | p__Proteobacteria | c__Deltaproteobacteria | o__Myxococcales       | f__Polyangiaceae,False,7       |
| k__Bacteria | p__Proteobacteria | c__Deltaproteobacteria | o__NB1-j              | __False,4                      |
| k__Bacteria | p__Proteobacteria | c__Deltaproteobacteria | o__NB1-j              | f__False,1                     |
| k__Bacteria | p__Proteobacteria | c__Deltaproteobacteria | o__NB1-j              | f__NB1-i,False,89              |
| k__Bacteria | p__Proteobacteria | c__Deltaproteobacteria | o__Spirobacillales    | f__False,0                     |

|             |                    |                        |                          |                                  |
|-------------|--------------------|------------------------|--------------------------|----------------------------------|
| k__Bacteria | p__Proteobacteria  | c__Deltaproteobacteria | o__Sva0853               | f__JTB36,False,2                 |
| k__Bacteria | p__Proteobacteria  | c__Deltaproteobacteria | o__Syntrophobacteriales  | f__Syntrophobacteraceae,False,7  |
| k__Bacteria | p__Proteobacteria  | c__Deltaproteobacteria | o__[Enotheonellales]     | f__[Enotheonellaceae],False,0    |
| k__Bacteria | p__Proteobacteria  | c__Gammaproteobacteria | __                       | __,False,17                      |
| k__Bacteria | p__Proteobacteria  | c__Gammaproteobacteria | o__Alteromonadales       | f__211ds20,False,4               |
| k__Bacteria | p__Proteobacteria  | c__Gammaproteobacteria | o__Chromatiales          | __,False,0                       |
| k__Bacteria | p__Proteobacteria  | c__Gammaproteobacteria | o__Enterobacteriales     | f__Enterobacteriaceae,False,0    |
| k__Bacteria | p__Proteobacteria  | c__Gammaproteobacteria | o__HTCC2188              | f__HTCC2089,False,2              |
| k__Bacteria | p__Proteobacteria  | c__Gammaproteobacteria | o__Legionellales         | __,True,110                      |
| k__Bacteria | p__Proteobacteria  | c__Gammaproteobacteria | o__Legionellales         | f__,False,3                      |
| k__Bacteria | p__Proteobacteria  | c__Gammaproteobacteria | o__Legionellales         | f__Coxiellaceae,False,9          |
| k__Bacteria | p__Proteobacteria  | c__Gammaproteobacteria | o__Legionellales         | f__Legionellaceae,False,50       |
| k__Bacteria | p__Proteobacteria  | c__Gammaproteobacteria | o__Pasteurellales        | f__Pasteurellaceae,False,7       |
| k__Bacteria | p__Proteobacteria  | c__Gammaproteobacteria | o__Pseudomonadales       | f__Moraxellaceae,False,1         |
| k__Bacteria | p__Proteobacteria  | c__Gammaproteobacteria | o__Pseudomonadales       | f__Pseudomonadaceae,False,4      |
| k__Bacteria | p__Proteobacteria  | c__Gammaproteobacteria | o__Thiotrichales         | f__Piscirickettsiaceae,False,0   |
| k__Bacteria | p__Proteobacteria  | c__Gammaproteobacteria | o__Vibrionales           | f__Vibrionaceae,False,6          |
| k__Bacteria | p__Proteobacteria  | c__Gammaproteobacteria | o__Xanthomonadales       | f__Sinobacteraceae,False,9       |
| k__Bacteria | p__Proteobacteria  | c__Gammaproteobacteria | o__Xanthomonadales       | f__Xanthomonadaceae,False,8      |
| k__Bacteria | p__Proteobacteria  | c__TA18                | o__PHOS-HD29             | f__,False,2                      |
| k__Bacteria | p__SBR1093         | c__                    | o__                      | f__,False,15                     |
| k__Bacteria | p__Spirochaetes    | c__[Leptospirae]       | o__[Leptospirales]       | f__Leptospiraceae,False,2        |
| k__Bacteria | p__TM6             | __                     | __                       | __,False,6                       |
| k__Bacteria | p__TM6             | c__SBRH58              | o__                      | f__,False,1                      |
| k__Bacteria | p__TM6             | c__SJA-4               | __                       | __,False,5                       |
| k__Bacteria | p__TM6             | c__SJA-4               | o__                      | f__,False,21                     |
| k__Bacteria | p__TM6             | c__SJA-4               | o__S1198                 | f__,False,0                      |
| k__Bacteria | p__TM6             | c__SJA-4               | o__YJF2-48               | f__,False,29                     |
| k__Bacteria | p__TM7             | __                     | __                       | __,False,0                       |
| k__Bacteria | p__TM7             | c__                    | o__                      | f__,False,0                      |
| k__Bacteria | p__TM7             | c__MJK10               | o__                      | f__,False,1                      |
| k__Bacteria | p__TM7             | c__SC3                 | o__                      | f__,False,0                      |
| k__Bacteria | p__TM7             | c__TM7-1               | o__                      | f__,False,33                     |
| k__Bacteria | p__TM7             | c__TM7-3               | o__                      | f__,False,2                      |
| k__Bacteria | p__TM7             | c__TM7-3               | o__EW055                 | f__,False,1                      |
| k__Bacteria | p__TM7             | c__TM7-3               | o__J025                  | f__,False,0                      |
| k__Bacteria | p__Tenericutes     | c__Mollicutes          | o__Anaeroplasmatales     | f__Anaeroplasmataceae,False,3    |
| k__Bacteria | p__Verrucomicrobia | __                     | __                       | __,False,1                       |
| k__Bacteria | p__Verrucomicrobia | c__Opitutae            | __                       | __,False,26                      |
| k__Bacteria | p__Verrucomicrobia | c__Opitutae            | o__Opitutales            | f__Opitutaceae,False,4           |
| k__Bacteria | p__Verrucomicrobia | c__Verrucomicrobiae    | o__Verrucomicrobiales    | f__Verrucomicrobiaceae,False,2   |
| k__Bacteria | p__Verrucomicrobia | c__[Methylacidiphilae] | o__Methylacidiphilales   | f__LD19,False,1                  |
| k__Bacteria | p__Verrucomicrobia | c__[Methylacidiphilae] | o__S-BQ2-57              | f__,False,0                      |
| k__Bacteria | p__Verrucomicrobia | c__[Pedosphaerae]      | o__[Pedosphaerales]      | __,False,0                       |
| k__Bacteria | p__Verrucomicrobia | c__[Pedosphaerae]      | o__[Pedosphaerales]      | f__,False,0                      |
| k__Bacteria | p__Verrucomicrobia | c__[Pedosphaerae]      | o__[Pedosphaerales]      | f__Ellin515,False,15             |
| k__Bacteria | p__Verrucomicrobia | c__[Pedosphaerae]      | o__[Pedosphaerales]      | f__Ellin517,False,0              |
| k__Bacteria | p__Verrucomicrobia | c__[Pedosphaerae]      | o__[Pedosphaerales]      | f__OPB35,False,6                 |
| k__Bacteria | p__Verrucomicrobia | c__[Pedosphaerae]      | o__[Pedosphaerales]      | f__auto67_4W,False,0             |
| k__Bacteria | p__Verrucomicrobia | c__[Spartobacteria]    | o__[Chthoniobacteriales] | f__[Chthoniobacteraceae],False,9 |
| k__Bacteria | p__WS2             | c__SHA-109             | o__                      | f__,False,3                      |
| k__Bacteria | p__WS3             | c__PRR-12              | o__LD1-PA13              | f__,False,0                      |
| k__Bacteria | p__WS3             | c__PRR-12              | o__Sediment-1            | f__,False,0                      |
| k__Bacteria | p__WS3             | c__PRR-12              | o__Sediment-1            | f__PRR-10,False,5                |
| k__Bacteria | p__WS6             | c__B142                | o__                      | f__,False,1                      |
| k__Bacteria | p__[Caldithrix]    | c__KSB1                | o__Ucn15732              | f__,False,2                      |
